# Supplementary material for: Synthesis of pyrazole anchored three-coordinated organoboranes and their application in the detection of picric acid
Source: Royal Society of Chemistry journal article supplement (doi:10.1039/d1dt00586c), 2021-01-01
Supplement: d1dt00586c1.pdf [file d1dt00586c1.pdf]

# Synthesis of pyrazole anchored three-coordinated organoboranes and their application in the detection of picric acid

Shreenibasa Sa<sup>‡</sup>,<sup>a</sup> Vanga Mukundam<sup>‡</sup>,<sup>a</sup> Anupa Kumari,<sup>b</sup> Ritwick Das<sup>b\*</sup> and Krishnan Venkatasubbaiah<sup>a\*</sup>

<sup>a</sup>School of Chemical Sciences, National Institute of Science Education and Research (NISER), HBNI, Bhubaneswar-752050, Odisha (India). <sup>b</sup>School of Physical Sciences, National Institute of Science Education and Research (NISER), HBNI, Bhubaneswar-752050, Odisha (India) Tel: 091-6742494165; E-mail: krishv@niser.ac.in.

## Experimental Section

### General Information

All reagents and starting materials were purchased from Sigma-Aldrich, Alfa-Aesar and Spectrochem chemical companies and used as received unless otherwise noted. Chlorinated solvents acetonitrile, and DMF were distilled from CaH<sub>2</sub>. THF and toluene were distilled from Na/benzophenone prior to use. All 400 MHz <sup>1</sup>H, 100 MHz <sup>13</sup>C, NMR spectra were recorded on a Bruker ARX 400 spectrometer operating at 400 MHz. All <sup>1</sup>H and <sup>13</sup>C NMR spectra were referenced internally to solvent signals. All NMR spectra were recorded at ambient temperature. ESI mass spectra were recorded on Bruker, micrOTOF-QII mass spectrometer. The absorbance spectra were recorded on a JASCO V-730 UV-Visible spectrometer. The fluorescence spectra were recorded using Edinburgh FS5 spectrofluorometer. Absolute fluorescence quantum yields of compounds **2a** and **2b** were measured by integrating sphere method using Edinburgh FS5 spectrofluorometer. The fluorescence spectra are corrected for the instrumental response. Cyclic voltammetry measurements were performed with a conventional three electrode cell using an electrochemical workstation (CH Instrument, Model: 1100A) The three-electrode system consisted of a Glassy carbon working electrode, a Pt wire as the secondary electrode, and a Ag wire as the reference electrode. The voltammograms were recorded with ca. 1.0 x10<sup>-3</sup> M solution in DMF containing Bu<sub>4</sub>NPF<sub>6</sub> (0.1 M) as the supporting electrolyte. The scans were referenced after the addition of a small amount of ferrocene as the internal standard. Single-crystal X-ray diffraction data were collected on a Bruker APEX-II diffractometer using Mo-K $\alpha$  radiation (0.71073 Å). SADABS absorption corrections were applied. The structures were solved and refined with SHELX suite of programs. All non-hydrogen atoms were refined with anisotropic displacement coefficients. The H atoms were placed at calculated positions and were refined as riding atoms. Crystallographic data for compounds **2a** & **2b** have been deposited with the Cambridge Crystallographic Data Center as supplementary publication no. CCDC- 2063185-2063186. Copies of the data can be obtained free of charge on application to CCDC, 12 Union Road, Cambridge CB2 1EZ, UK (fax: (+44) 1223-336-033; email: [deposit@ccdc.cam.ac.uk](mailto:deposit@ccdc.cam.ac.uk)). DFT calculations were performed

with the Gaussian09 program.<sup>1</sup> The structures were optimized using 6-31G(d,p) (B3LYP) as the basis set. Frequency calculations confirmed the optimized structures to be local minimum structures. Excitation data were determined using TD-DFT (B3LYP/631g(d,p))–calculations.

## References:

1. Gaussian 09 (Rev. C.02), M. J. Frisch, G. W. Trucks, H. B. Schlegel, G. E. Scuseria, M. A. Robb, J. R. Cheeseman, G. Scalmani, V. Barone, B. Mennucci, G. A. Petersson, H. Nakatsuji, M. Caricato, X. Li, H. P. Hratchian, A. F. Izmaylov, J. Bloino, G. Zheng, J. L. Sonnenberg, M. Hada, M. Ehara, K. Toyota, R. Fukuda, J. Hasegawa, M. Ishida, T. Nakajima, Y. Honda, O. Kitao, H. Nakai, T. Vreven, J. J. A. Montgomery, J. E. Peralta, F. Ogliaro, M. Bearpark, J. J. Heyd, E. Brothers, K. N. Kudin, V. N. Staroverov, R. Kobayashi, J. Normand, K. Raghavachari, A. Rendell, J. C. Burant, S. S. Iyengar, J. Tomasi, M. Cossi, N. Rega, N. J. Millam, M. Klene, J. E. Knox, J. B. Cross, V. Bakken, C. Adamo, J. Jaramillo, R. Gomperts, R. E. Stratmann, O. Yazyev, A. J. Austin, R. Cammi, C. Pomelli, J. W. Ochterski, R. L. Martin, K. Morokuma, V. G. Zakrzewski, G. A. Voth, P. Salvador, J. J. Dannenberg, S. Dapprich, A. D. Daniels, J. P. Farkas, J. B. Foresman, J. V. Ortiz, J. Cioslowski and D. J. Fox, Gaussian, Inc., Wallingford CT, 2009.

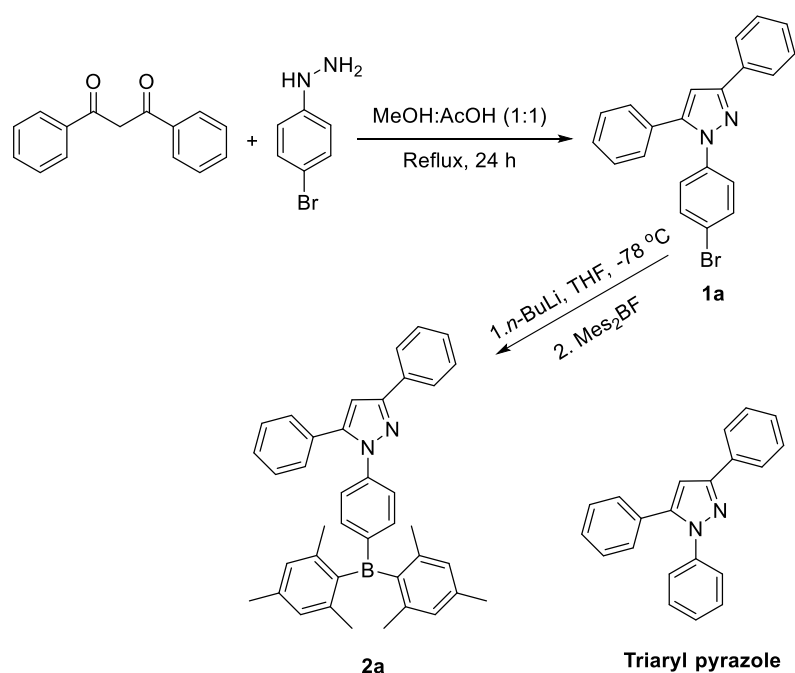

**Scheme S1:** Synthetic pathway for compound **2a** and chemdraw of **Triaryl pyrazole**

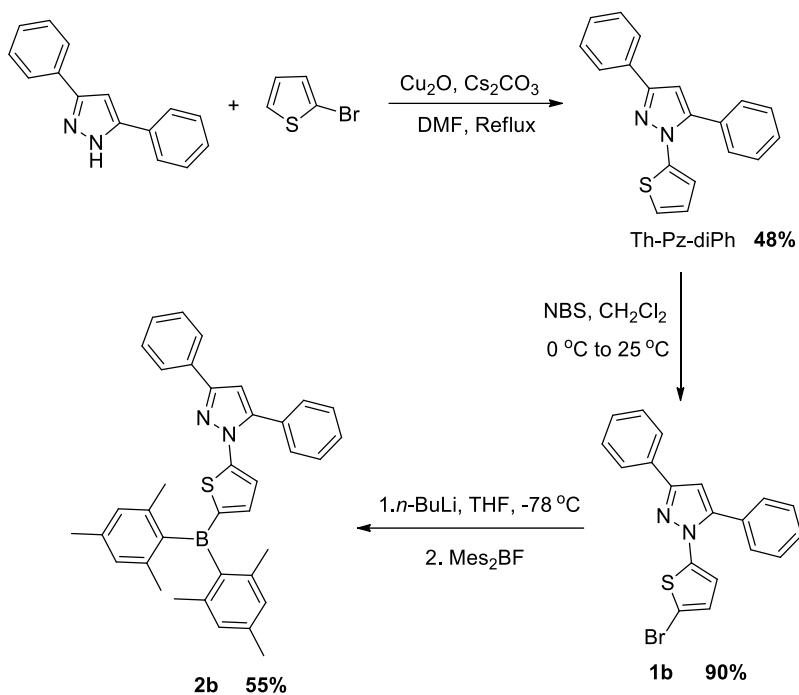

**Scheme S2:** Synthetic pathway for compound **2b**.

**Table S1:** Photophysical data of compound **2a**, **2b** and **triaryl pyrazole**

| Compound                | solvent                         | $\lambda_{\text{abs}}^{\text{a}}$<br>(nm) | $\epsilon_{\text{max}}$<br>(M <sup>-1</sup> cm <sup>-1</sup> × 10 <sup>3</sup> ) | $\lambda_{\text{em}}^{\text{a,b}}$ (nm) | $\Phi_{\text{f}}^{\text{c}}$ |
|-------------------------|---------------------------------|-------------------------------------------|----------------------------------------------------------------------------------|-----------------------------------------|------------------------------|
| <b>2a</b>               | Toluene                         | 334                                       | 33.19                                                                            | 370                                     | 0.30                         |
|                         | THF                             | 333                                       | 36.55                                                                            | 377                                     | 0.23                         |
|                         | CH <sub>2</sub> Cl <sub>2</sub> | 331                                       | 30.00                                                                            | 383                                     | 0.14                         |
|                         | CH <sub>3</sub> CN              | 328                                       | 30.88                                                                            | 403                                     | 0.12                         |
| <b>2b</b>               | Toluene                         | 368                                       | 25.00                                                                            | 411                                     | 0.17                         |
|                         | THF                             | 366                                       | 33.74                                                                            | 413                                     | 0.15                         |
|                         | CH <sub>2</sub> Cl <sub>2</sub> | 361                                       | 27.61                                                                            | 413                                     | 0.14                         |
|                         | CH <sub>3</sub> CN              | 358                                       | 29.61                                                                            | 415                                     | 0.12                         |
| <b>Triaryl pyrazole</b> | THF                             | 258                                       | 21.3                                                                             | 365                                     | 0.08                         |

<sup>a</sup>Absorption maximum (concentrations in solutions were 10<sup>-5</sup> M). <sup>b</sup>Excited at absorption maximum. <sup>c</sup> Absolute fluorescence quantum yields were measured by integrating sphere method.

**Table S2:** Details of X-ray crystal structure analyses of compound **2a** and **2b**.

|                                                               | <b>2a</b>                                               | <b>2b</b>                                               |
|---------------------------------------------------------------|---------------------------------------------------------|---------------------------------------------------------|
| formula                                                       | C <sub>39</sub> H <sub>37</sub> BN <sub>2</sub>         | C <sub>37</sub> H <sub>35</sub> BN <sub>2</sub> S       |
| M <sub>r</sub>                                                | 544.51                                                  | 550.54                                                  |
| T [K]                                                         | 100                                                     | 296.15                                                  |
| wavelength, Å                                                 | 0.71073 Å                                               | 0.71073 Å                                               |
| crystal system                                                | Monoclinic                                              | Monoclinic                                              |
| space group                                                   | <i>P2<sub>1</sub>/n</i>                                 | <i>P2<sub>1</sub>/c</i>                                 |
| a [Å]                                                         | 8.2587(4)                                               | 13.5234(3)                                              |
| b [Å]                                                         | 30.5396(17)                                             | 11.1663(3)                                              |
| c [Å]                                                         | 11.9793(7)                                              | 20.6115(5)                                              |
| α [°]                                                         | 90                                                      | 90                                                      |
| β [°]                                                         | 91.502(3)                                               | 93.494(2)                                               |
| δ [°]                                                         | 90                                                      | 90                                                      |
| V [Å <sup>3</sup> ]                                           | 3020.3(3)                                               | 3106.68(13)                                             |
| Z                                                             | 4                                                       | 4                                                       |
| ρ <sub>calc</sub> [g cm <sup>-3</sup> ]                       | 1.197                                                   | 1.177                                                   |
| μ (MoKα) [mm <sup>-1</sup> ]                                  | 0.069                                                   | 0.132                                                   |
| F (000)                                                       | 1160.0                                                  | 1168.0                                                  |
| Crystal size [mm]                                             | 0.22 × 0.2 × 0.15                                       | 0.23 × 0.21 × 0.2                                       |
| θ range [°]                                                   | 6.806 – 49.994                                          | 3.96 – 55.868                                           |
| limiting indices                                              | -9 ≤ h ≤ 9<br>-35 ≤ k ≤ 36<br>-13 ≤ l ≤ 14              | -17 ≤ h ≤ 17<br>-14 ≤ k ≤ 13<br>-27 ≤ l ≤ 27            |
| reflns collected                                              | 24571                                                   | 26106                                                   |
| independent reflns                                            | 5296                                                    | 7413                                                    |
| absorption correction                                         | [R(int) = 0.0940]<br>Semi-empirical from<br>equivalents | [R(int) = 0.0385]<br>Semi-empirical from<br>equivalents |
| refinement method                                             | Full-matrix least square<br>on F <sup>2</sup>           | Full-matrix least square on F <sup>2</sup>              |
| data / restraints / parameters                                | 5296/0/385                                              | 7413/0/376                                              |
| Goodness-of-fit on F <sup>2</sup>                             | 1.038                                                   | 1.029                                                   |
| final R indices                                               | R <sub>I</sub> = 0.0491                                 | R <sub>I</sub> = 0.0474                                 |
| [ I > 2σ(I) ] <sup>[a]</sup>                                  | wR <sub>2</sub> = 0.1150                                | wR <sub>2</sub> = 0.1215                                |
| R indices (all data) <sup>[a]</sup>                           | R <sub>I</sub> = 0.0675                                 | R <sub>I</sub> = 0.0760                                 |
|                                                               | wR <sub>2</sub> = 0.1252                                | wR <sub>2</sub> = 0.1380                                |
| peak <sub>max</sub> /hole <sub>min</sub> [e Å <sup>-3</sup> ] | 0.28 and -0.27                                          | 0.26 and -0.24                                          |

<sup>[a]</sup>  $R_I = \Sigma ||F_o| - |F_c|| / \Sigma |F_o|$ ;  $wR_2 = \{ \Sigma [w(F_o^2 - F_c^2)^2] / \Sigma [w(F_o^2)^2] \}^{1/2}$ .

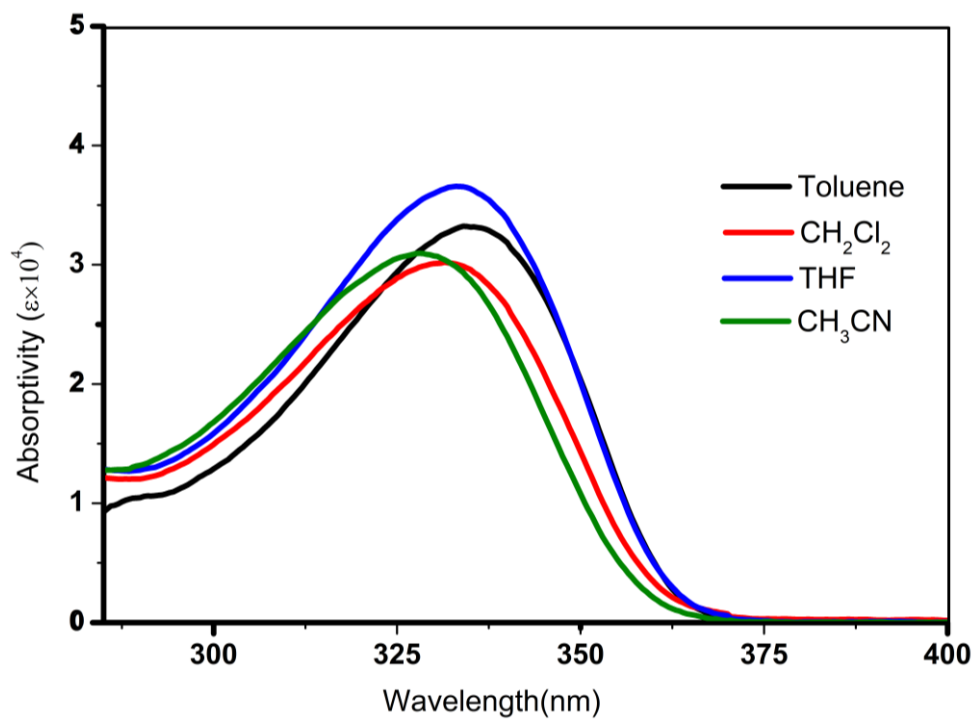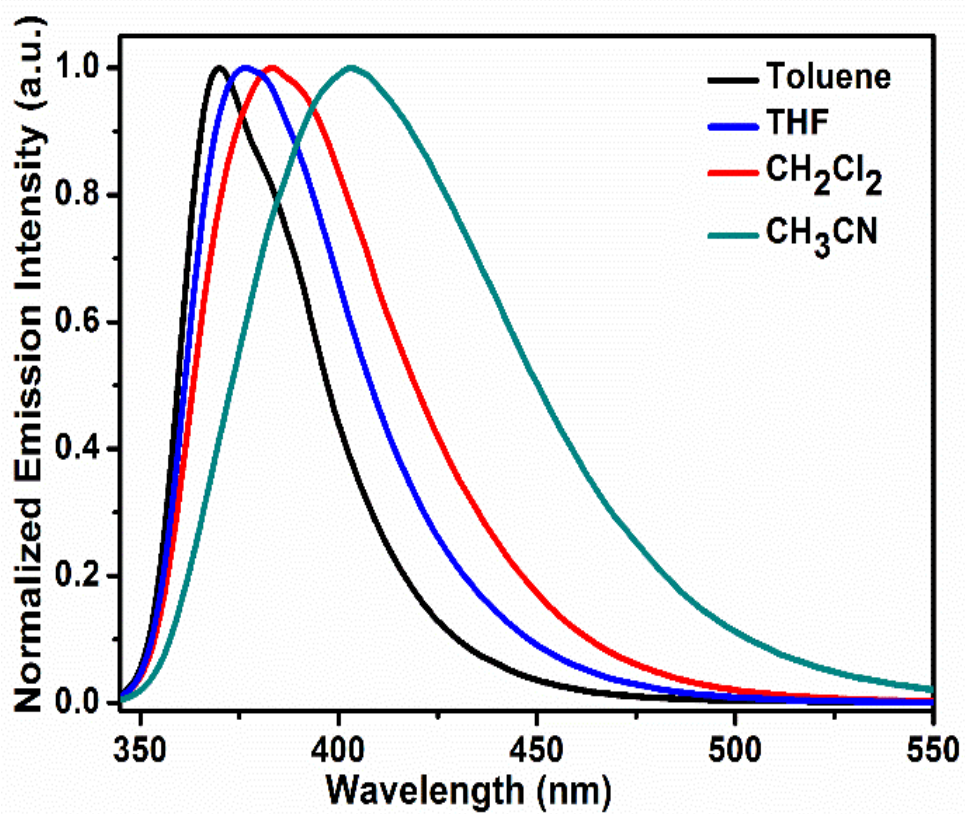

**Figure S1.** UV-Vis absorption (top) & Normalized fluorescence spectra (bottom) of compound **2a** in different solvents (Concentration =  $10^{-5}$  M, excited at  $\lambda_{\text{abs}}$ ).

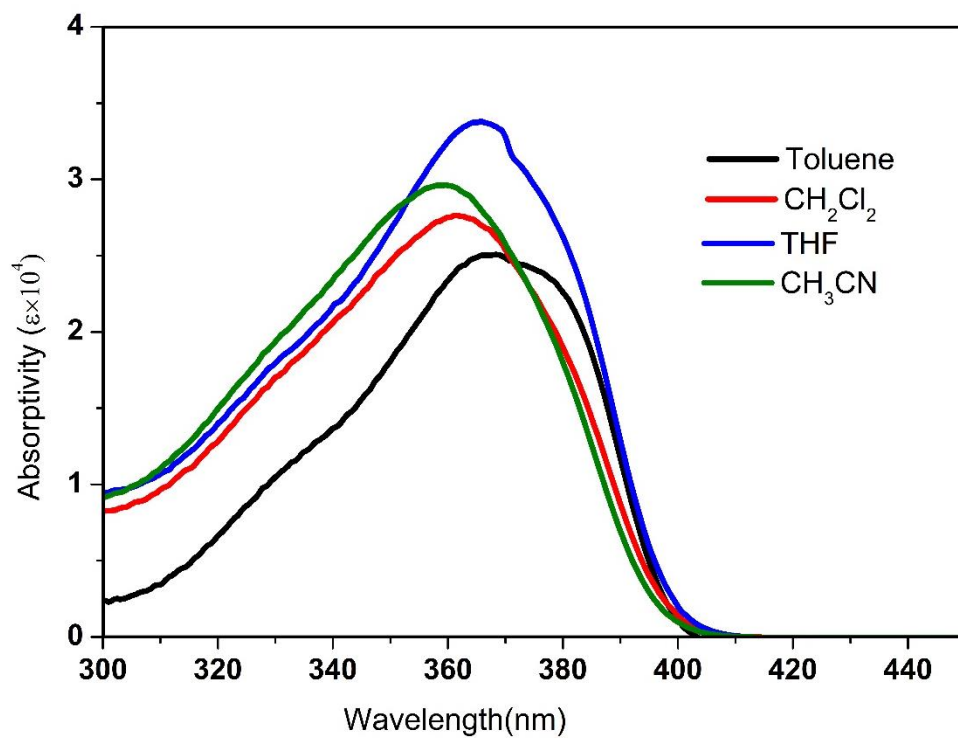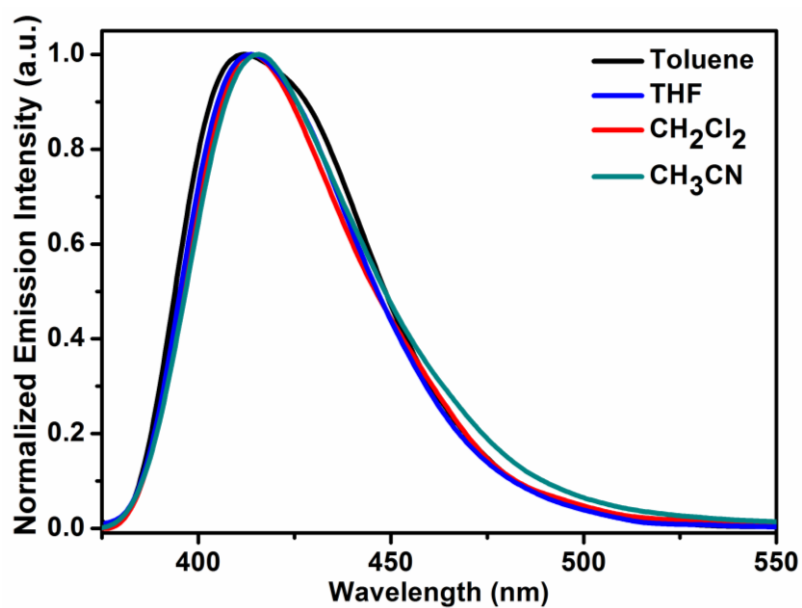

**Figure S2:** UV-Vis absorption (top) & Normalized emission spectra (bottom) of compound **2b** in different solvents (Concentration =  $10^{-5}$  M, excited at  $\lambda_{\text{abs}}$ ).

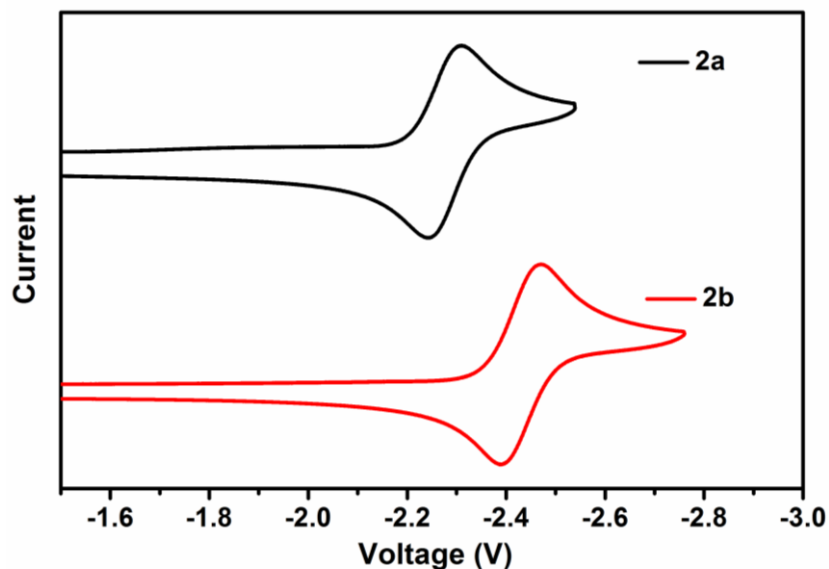

**Figure S3:** Cyclic voltammograms of compound **2a** & **2b** (vs. Ferrocene/Ferrocenium) with 0.1 M  $\text{Bu}_4\text{NPF}_6$  in DMF as the supporting electrolyte (scan rate 100 mV/s).

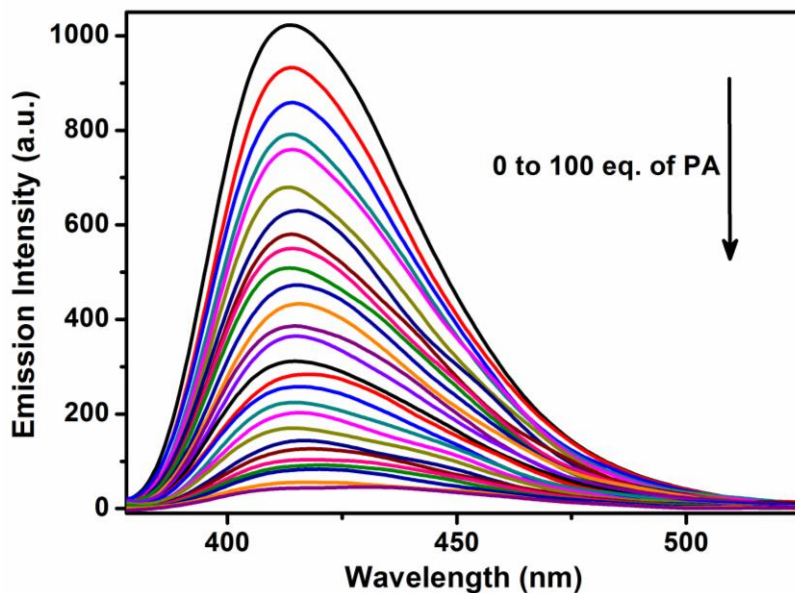

**Figure S4:** Fluorescence quenching of Compound **2b** with the addition of different concentrations of PA (0, 2, 4, 6, 8, 10, 12, 14, 16, 18, 20, 23, 26, 29, 33, 37, 41, 45, 50, 55, 60, 65, 70, 75, 80, 90, and 100 equiv of PA) in THF ( $10^{-5}$  M; excited at 366 nm).

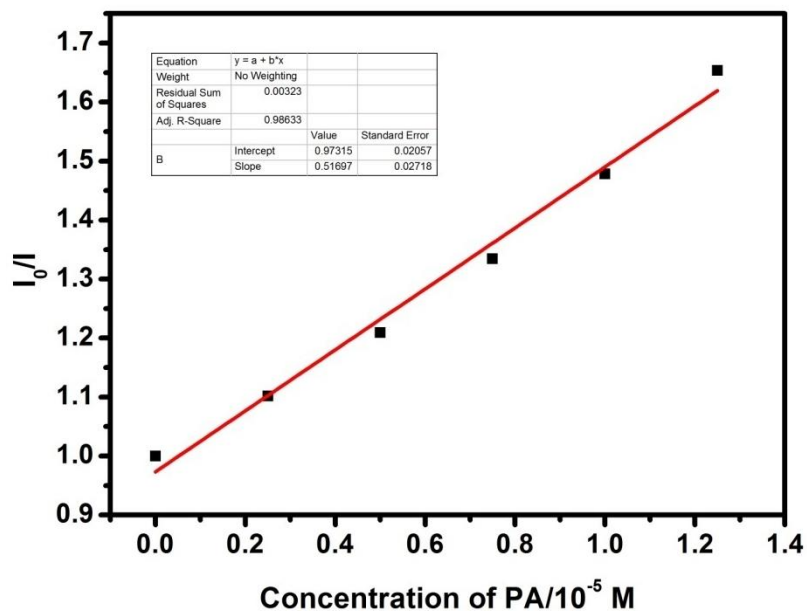

**Figure S5:** Stern-Volmer plot of compound **2a** ( $10^{-5}\text{M}$ ) with addition of different concentration of PA in THF.

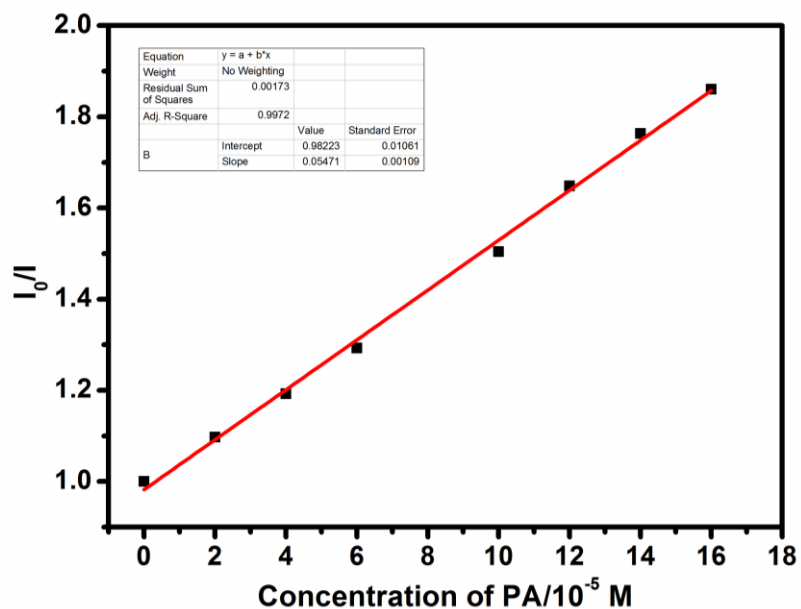

**Figure S6:** Stern-Volmer plot of compound **2b** ( $10^{-5}\text{M}$ ) with addition of different concentration of PA in THF.



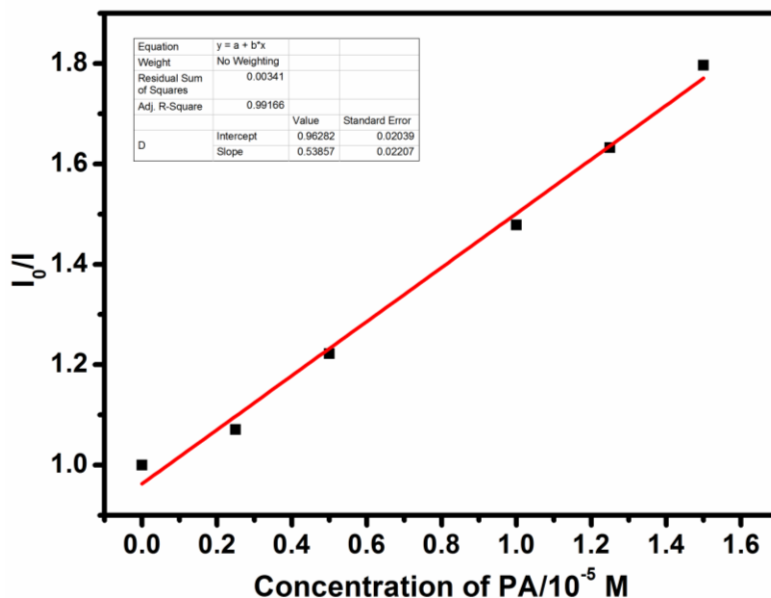

**Figure S7:** Stern-Volmer plot of compound **2a** ( $10^{-5}$ M) with addition of different concentration of PA in THF: H<sub>2</sub>O (70:30) mixture.

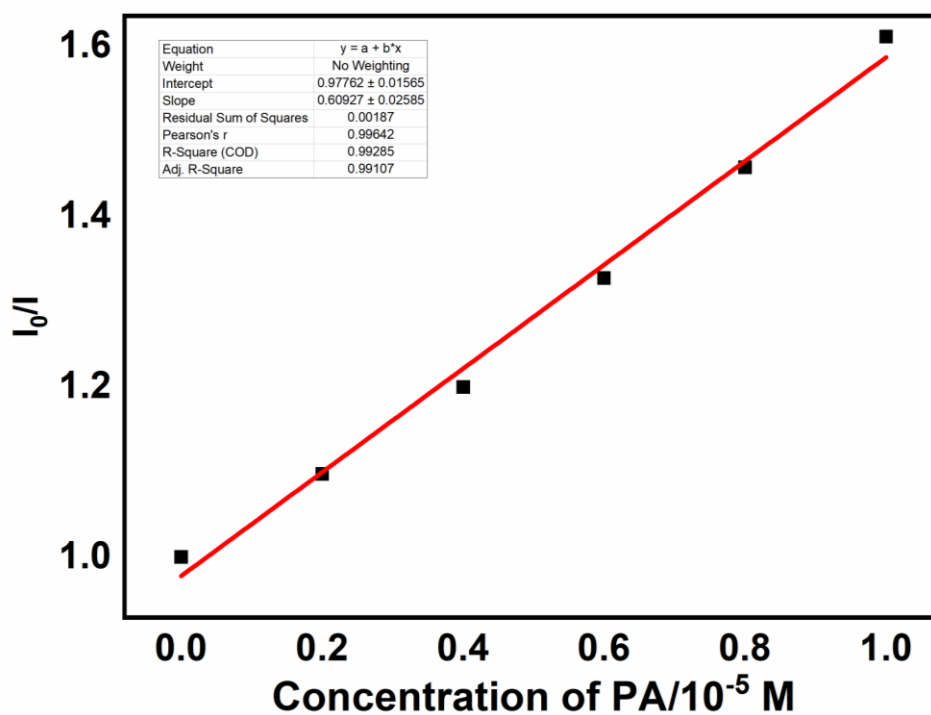

**Figure S8:** Stern-Volmer plot of compound **2b** ( $10^{-5}$ M) with addition of different concentration of PA in THF: H<sub>2</sub>O (70:30) mixture.

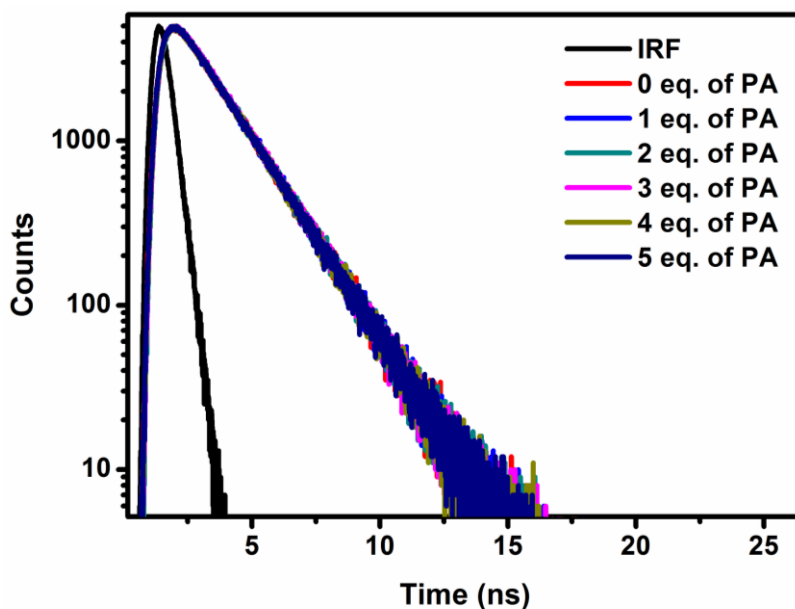

**Figure S9:** Fluorescence lifetime decay of compound **2a** after the addition of 0, 1, 2, 3, 4 and 5 equiv. of PA in THF (Concentration =  $10^{-5}$  M).

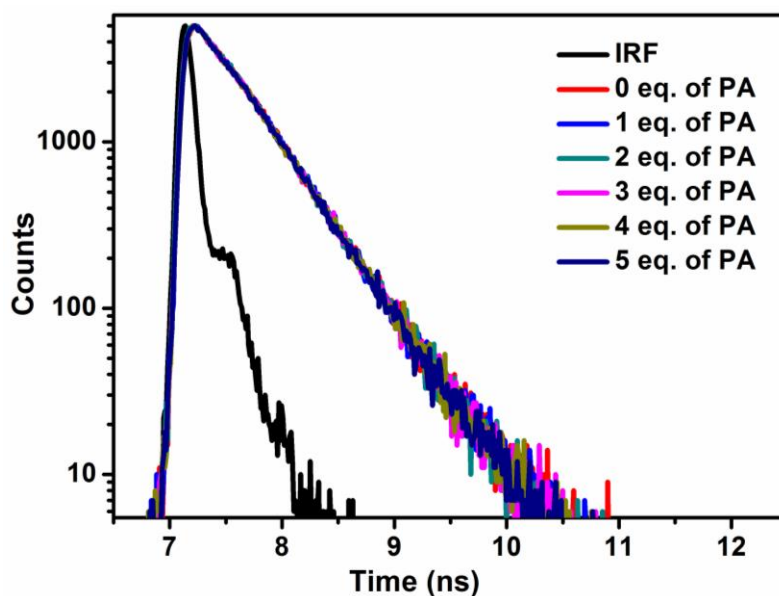

**Figure S10:** Fluorescence lifetime decay of compound **2b** after the addition of 0, 1, 2, 3, 4 and 5 equiv. of PA in THF (Concentration =  $10^{-5}$  M).

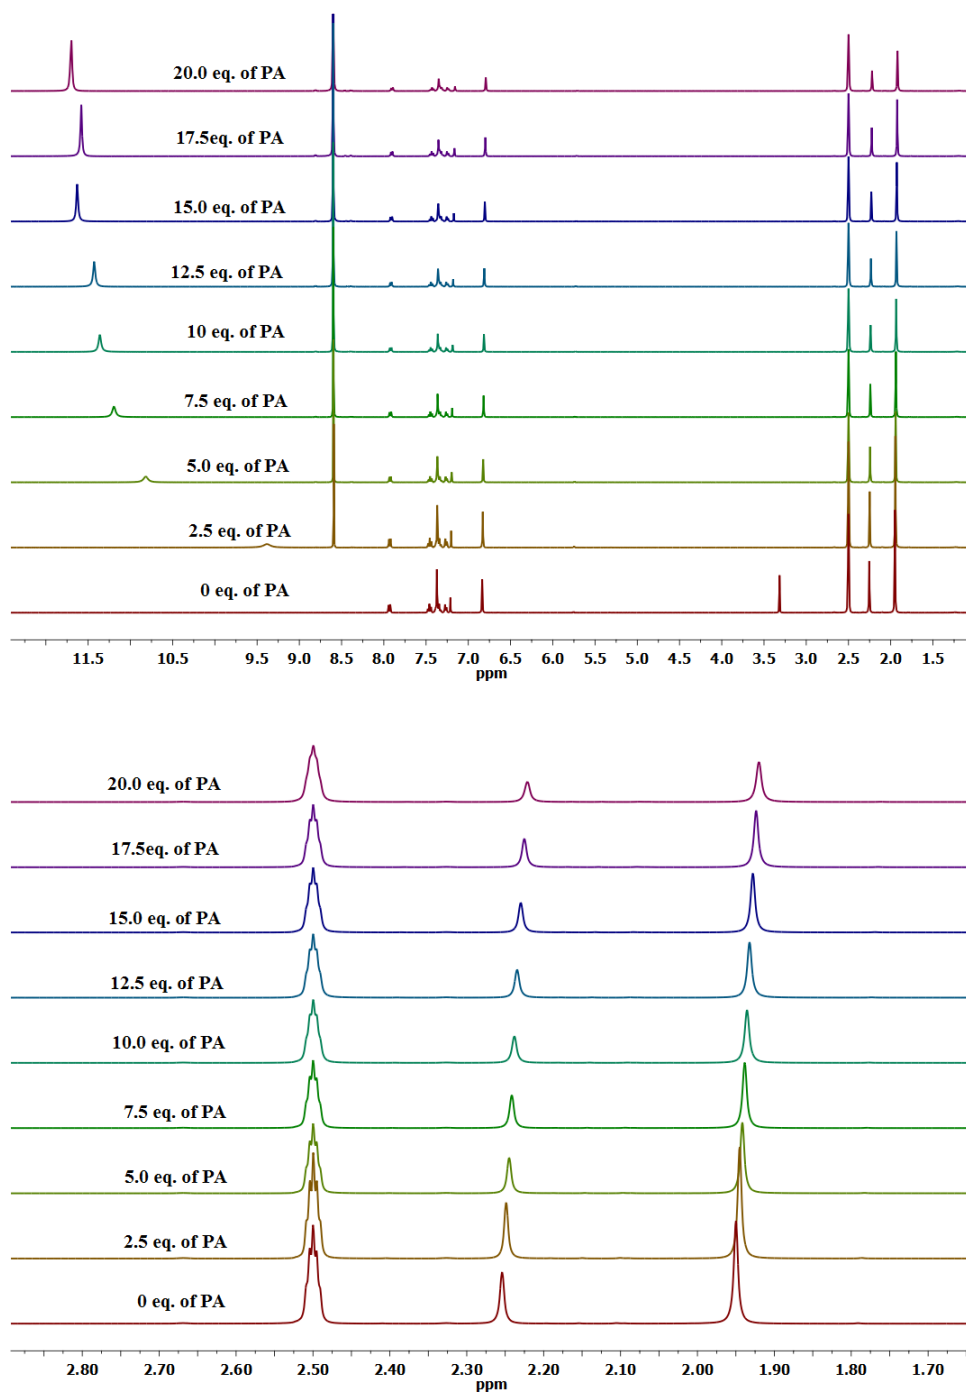

**Figure S11:**  $^1\text{H}$  NMR titration of compound **2a** upon the addition of 0, 2.5, 5.0, 7.5, 10.0, 12.5, 15.0, 17.5 and 20.0 equiv. of PA in DMSO- $d_6$ .

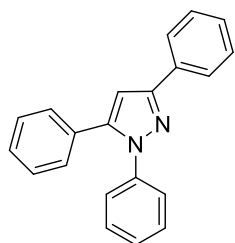

**Triphenyl pyrazole**

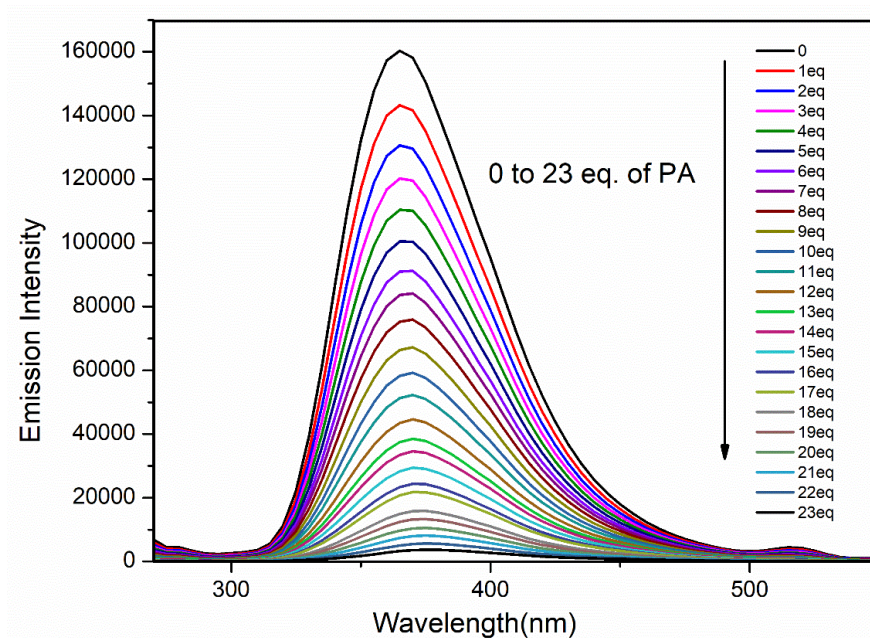

Figure S12: Fluorescence quenching of **triphenyl pyrazole** in  $10^{-5}$  M THF with addition of 0 to 23 equiv. of PA.

**Table S3:** LOD data for Compound **2a-2b** and Ligand **2a-2b**

| Probe                     | Detection Medium            | Detection Limit         |
|---------------------------|-----------------------------|-------------------------|
| Compound <b>2a</b>        | THF:H <sub>2</sub> O(70:30) | $1.63 \times 10^{-7}$ M |
| Compound <b>2b</b>        | THF:H <sub>2</sub> O(70:30) | $1.95 \times 10^{-7}$ M |
| Compound <b>2a</b>        | THF                         | $1.28 \times 10^{-7}$ M |
| Compound <b>2b</b>        | THF                         | $3.06 \times 10^{-4}$ M |
| <b>Triphenyl pyrazole</b> | THF                         | $8.41 \times 10^{-7}$ M |

The detection limits were calculated with the following equation:

$$\text{Detection limit} = 3\sigma/K$$

Where  $\sigma$  is the standard deviation of blank measurement and K is the slope between the emission counts vs picric acid concentration.

References: *RSC Adv.*, 2015, **5**, 74924-74931.

**Table S4:** Comparison of detection limits of recently reported probes for PA in the literature with compound **2a** and compound **2b**

| Probe                                                                               | Detection Medium                          | Detection Limit(M)              | References                                      |
|-------------------------------------------------------------------------------------|-------------------------------------------|---------------------------------|-------------------------------------------------|
| 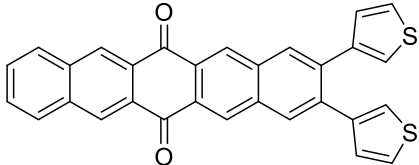   | THF                                       | $1 \times 10^{-6}$              | <i>Org. Lett.</i> , 2012, <b>14</b> , 1312-1315 |
|   | CH <sub>3</sub> CN:H <sub>2</sub> O (9:1) | $7.27 \times 10^{-7}$           | <i>RSC Adv.</i> , 2014, <b>4</b> , 7120-7123    |
|  | H <sub>2</sub> O:CH <sub>3</sub> OH (8:2) | $4.3 \times 10^{-6}$            | <i>Anal. Methods</i> , 2015, <b>7</b> , 10272   |
|  | CH <sub>3</sub> CN                        | $2.42 \times 10^{-6}$           | <i>Talanta</i> , 2017, <b>174</b> , 462-467     |
|  | THF:H <sub>2</sub> O (70:30)              | $1.63 \times 10^{-7} \text{ M}$ | This work                                       |
|  | THF:H <sub>2</sub> O (70:30)              | $1.95 \times 10^{-7} \text{ M}$ | This work                                       |

**Table S5.** Calculated electronic transitions for compound **2a** & **2b** from TD-DFT (B3LYP/631g(d,p))–PCM solvation (THF)) calculations

| Compound                  | Transition            | MO contributions                                     | Energy gap<br>eV (nm) | Oscillator<br>strength/f |
|---------------------------|-----------------------|------------------------------------------------------|-----------------------|--------------------------|
| <b>2a</b>                 | $S_0 \rightarrow S_1$ | HOMO-2 $\rightarrow$ LUMO                            | 3.42 (361)            | 0.5599                   |
|                           |                       | HOMO $\rightarrow$ LUMO                              |                       |                          |
|                           | $S_0 \rightarrow S_2$ | HOMO-1 $\rightarrow$ LUMO                            | 3.47 (357)            | 0.1042                   |
|                           | $S_0 \rightarrow S_3$ | HOMO-3 $\rightarrow$ LUMO                            | 3.37 (337)            | 0.0266                   |
|                           |                       | HOMO-2 $\rightarrow$ LUMO<br>HOMO $\rightarrow$ LUMO |                       |                          |
| <b>2b</b>                 | $S_0 \rightarrow S_1$ | HOMO-3 $\rightarrow$ LUMO                            | 3.24 (382)            | 0.7038                   |
|                           |                       | HOMO $\rightarrow$ LUMO                              |                       |                          |
|                           | $S_0 \rightarrow S_2$ | HOMO-1 $\rightarrow$ LUMO                            | 3.46 (358)            | 0.0870                   |
|                           | $S_0 \rightarrow S_3$ | HOMO-3 $\rightarrow$ LUMO                            | 3.59 (345)            | 0.0084                   |
|                           |                       | HOMO-2 $\rightarrow$ LUMO                            |                       |                          |
| <b>2a-PA</b>              | $S_0 \rightarrow S_1$ | HOMO-3 $\rightarrow$ LUMO                            | 2.28 (541)            | 0.0027                   |
|                           |                       | HOMO-1 $\rightarrow$ LUMO                            |                       |                          |
|                           |                       | HOMO $\rightarrow$ LUMO                              |                       |                          |
|                           | $S_0 \rightarrow S_2$ | HOMO-1 $\rightarrow$ LUMO                            | 2.43 (508)            | 0.0000                   |
|                           |                       | HOMO $\rightarrow$ LUMO                              |                       |                          |
|                           | $S_0 \rightarrow S_3$ | HOMO-3 $\rightarrow$ LUMO                            | 2.55 (484)            | 0.0002                   |
| HOMO-2 $\rightarrow$ LUMO |                       |                                                      |                       |                          |
| <b>2b-PA</b>              | $S_0 \rightarrow S_1$ | HOMO $\rightarrow$ LUMO                              | 2.07 (597)            | 0.0005                   |
|                           | $S_0 \rightarrow S_2$ | HOMO-3 $\rightarrow$ LUMO                            | 2.36 (524)            | 0.0000                   |

|                    |       |                                |            |        |
|--------------------|-------|--------------------------------|------------|--------|
|                    | S0→S3 | HOMO-1→LUMO<br>HOMO-2→LUMO     | 2.41 (513) | 0.0001 |
| <b>Picric acid</b> | S0→S1 | HOMO→LUMO                      | 3.62 (341) | 0.1196 |
|                    | S0→S2 | HOMO-9→LUMO+2                  | 3.85 (321) | 0.0068 |
|                    |       | HOMO-6→LUMO+2                  |            |        |
|                    |       | HOMO-5→LUMO                    |            |        |
|                    |       | HOMO-4→LUMO                    |            |        |
|                    |       | HOMO-4→LUMO+2                  |            |        |
|                    |       | HOMO-2→LUMO                    |            |        |
|                    |       | HOMO-2→LUMO+1                  |            |        |
|                    |       | HOMO-2→LUMO+2                  |            |        |
|                    |       | HOMO→LUMO                      |            |        |
|                    |       | HOMO→LUMO+2                    |            |        |
|                    | S0→S3 | HOMO-3→LUMO+1<br>HOMO-3→LUMO+2 | 3.93 (314) | 0.0001 |

**Table S6.** Computed orbitals for compounds **2a**, **2b**, **2a-PA**, **2b-PA**, & **picric acid**

| Compound | 2a                                                                                                                                 | 2b                                                                                                                                    |
|----------|------------------------------------------------------------------------------------------------------------------------------------|---------------------------------------------------------------------------------------------------------------------------------------|
| LUMO+2   | 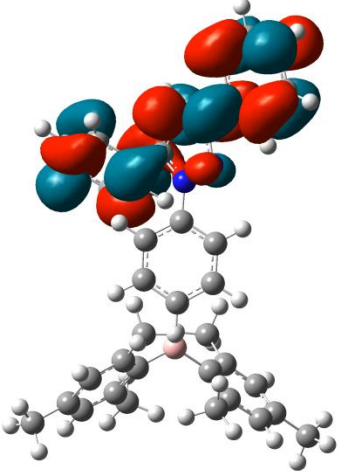 <p data-bbox="616 913 754 949">-0531(eV)</p>     |  <p data-bbox="1023 869 1169 904">-0.581(eV)</p>    |
| LUMO+1   |  <p data-bbox="616 1496 754 1532">-0.853(eV)</p> |  <p data-bbox="1023 1496 1169 1532">-0.936(eV)</p> |



|        |                                                                                                       |                                                                                                        |
|--------|-------------------------------------------------------------------------------------------------------|--------------------------------------------------------------------------------------------------------|
| LUMO   | 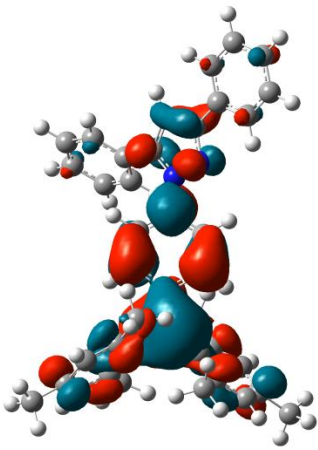 <p>-1.822(eV)</p>   |  <p>-1.921(eV)</p>   |
| HOMO   |  <p>-5.794(eV)</p>  |  <p>-5.707(eV)</p>  |
| HOMO-1 |  <p>-6.052(eV)</p> |  <p>-6.096(eV)</p> |

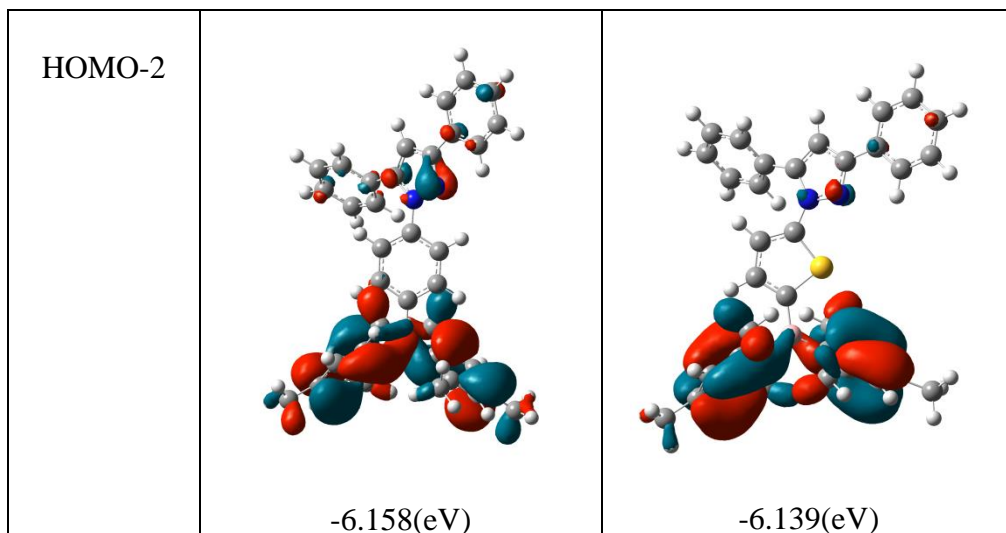

| Compound | 2a-PA                                                                               | 2b-PA                                                                                | Picric acid                                                                           |
|----------|-------------------------------------------------------------------------------------|--------------------------------------------------------------------------------------|---------------------------------------------------------------------------------------|
| LUMO+2   | 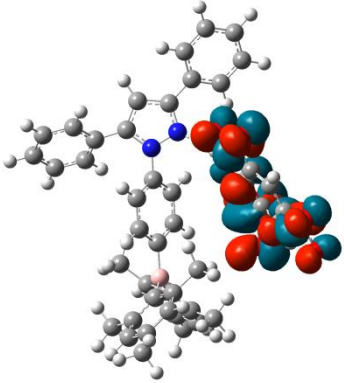 |  |  |
|          | -2.593(eV)                                                                          | -2.618 (eV)                                                                          | -2.952 (eV)                                                                           |
| LUMO+1   |  |  |  |
|          | -2.928(eV)                                                                          | -2.965 (eV)                                                                          | -3.303 (eV)                                                                           |

|        |                                                                                                                                     |                                                                                                                                       |                                                                                                                                          |
|--------|-------------------------------------------------------------------------------------------------------------------------------------|---------------------------------------------------------------------------------------------------------------------------------------|------------------------------------------------------------------------------------------------------------------------------------------|
| LUMO   | 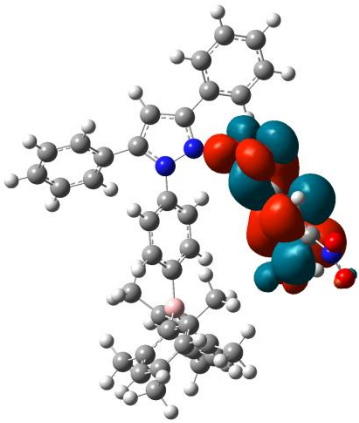 <p data-bbox="435 636 580 674">-3.245(eV)</p>     |  <p data-bbox="842 663 995 701">-3.358 (eV)</p>     |  <p data-bbox="1225 465 1378 504">-3.913 (eV)</p>     |
| HOMO   |  <p data-bbox="432 1200 585 1238">-6.016 (eV)</p> |  <p data-bbox="839 1216 992 1254">-5.910 (eV)</p>  |  <p data-bbox="1225 1032 1378 1070">-8.227 (eV)</p>   |
| HOMO-1 |  <p data-bbox="432 1749 585 1787">-6.047(eV)</p> |  <p data-bbox="839 1765 992 1803">-6.126 (eV)</p> |  <p data-bbox="1225 1585 1378 1624">-8.586 (eV)</p> |

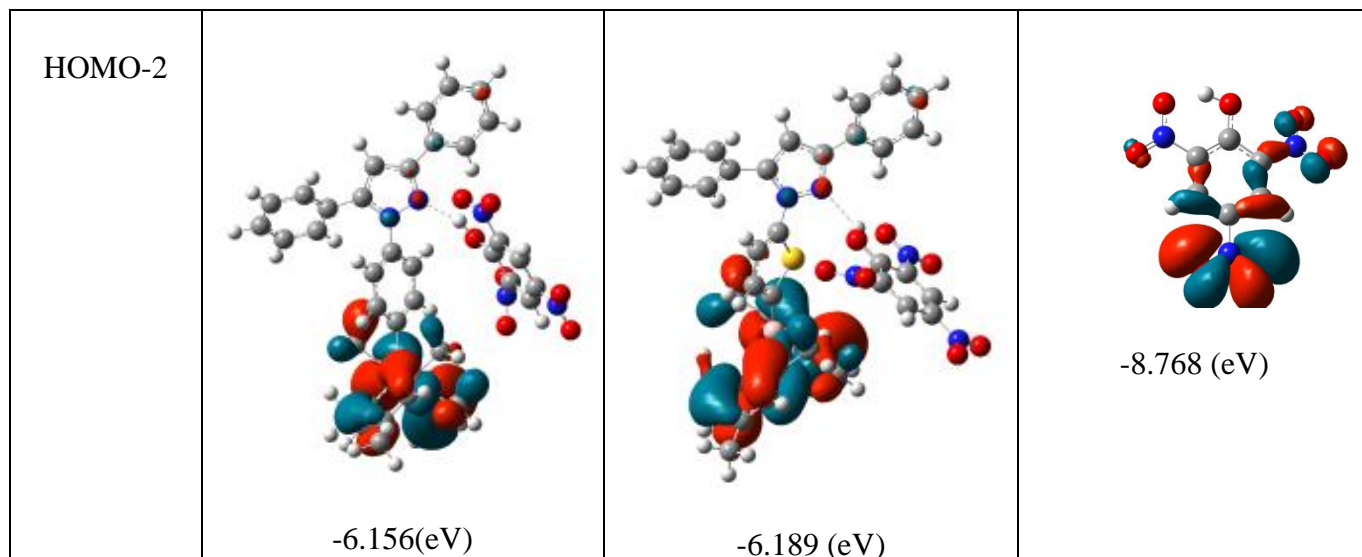

**Table S7:** Calculated energy for compounds **2a**, **2b**, **2a-PA**, **2b-PA** and **picric acid**.

| Compound           | HOMO (eV) | LUMO (eV) |
|--------------------|-----------|-----------|
| <b>2a</b>          | -5.794    | -1.822    |
| <b>2b</b>          | -5.707    | -1.921    |
| <b>2a-PA</b>       | -6.016    | -3.245    |
| <b>2b-PA</b>       | -5.910    | -3.358    |
| <b>Picric acid</b> | -8.227    | -3.913    |

**Table S8:** Comparison of optical nonlinearity coefficients of similar molecules

| Compound       | Laser Parameters    | $n_2$ (cm <sup>2</sup> W <sup>-1</sup> ) | $\beta$ (cm W <sup>-1</sup> ) | TPAC (GM) | Reference                                              |
|----------------|---------------------|------------------------------------------|-------------------------------|-----------|--------------------------------------------------------|
| BPI* (crystal) | He-Ne Laser         | -4.27x10 <sup>-8</sup>                   | 3.37x10 <sup>-3</sup>         |           | <i>J. Opt.</i> , 2017, <b>46</b> , 382–390             |
| PP* (crystal)  | 532nm, CW Nd-Yag    | -7.35x10 <sup>-8</sup>                   | -0.10x10 <sup>-4</sup>        |           | <i>J. Mol. Struct.</i> , 2019, <b>1190</b> , 1-10.     |
| 45-1           | 735 nm              | -                                        | -                             | 22        | <i>Chem. Sci.</i> , 2017, <b>8</b> , 846–863           |
| N2TFABD P*     | 1200nm,45fs, 1kHz   | -                                        | -                             | 9         | <i>Dyes Pigm.</i> , 2013, <b>99</b> , 979 - 985        |
| N2TFABD P*     | 1200nm,45fs, 1kHz   | -                                        | -                             | 9         | <i>Dyes Pigm.</i> , 2013, <b>99</b> , 979 - 985        |
| 3TFABDP*       | 1200nm,45fs, 1kHz   | -                                        | -                             | 8         | <i>Dyes Pigm.</i> , 2013, <b>99</b> , 979 - 985        |
| TVBVT*         | 800nm, 100fs, 82MHz | -9.72 x 10 <sup>-10</sup>                | -                             | -         | <i>Dyes Pigm.</i> , 2019, <b>162</b> , 776-785         |
| HEAP*          | He-Ne               | -9.2 x 10 <sup>-5</sup>                  | 14.0                          |           | <i>Mater. Chem. Phys.</i> , 2012, <b>134</b> , 736-746 |

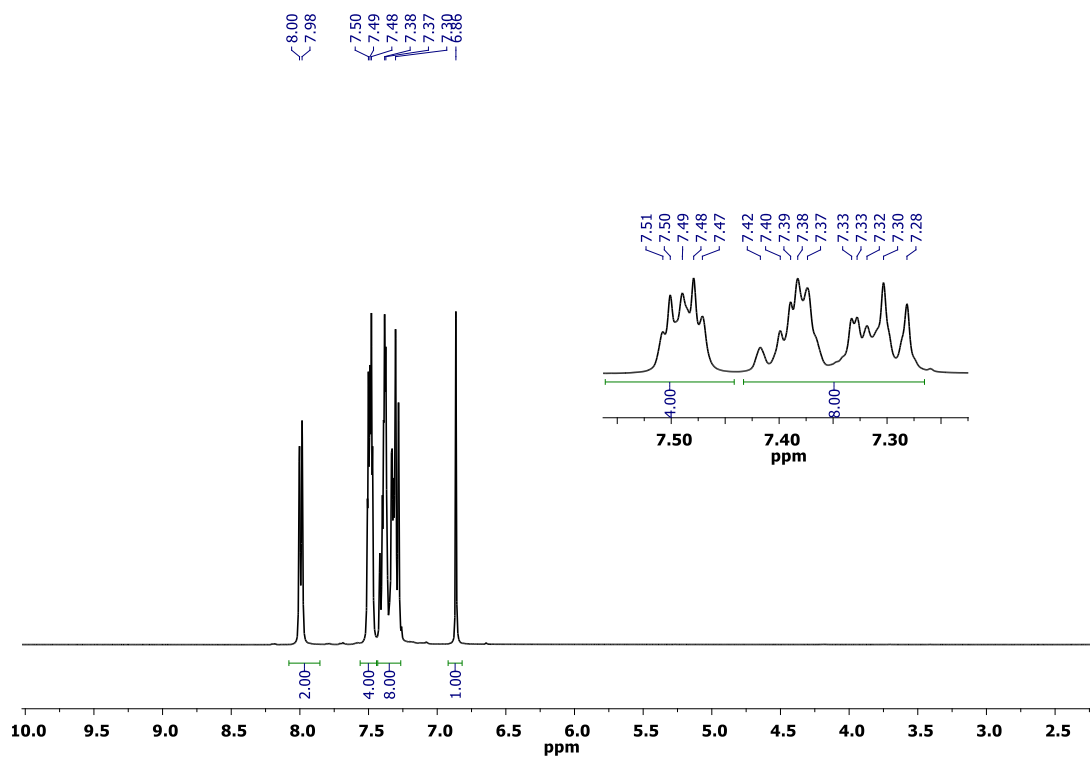

**Figure S13:**  $^1\text{H}$  NMR of compound **1a**.

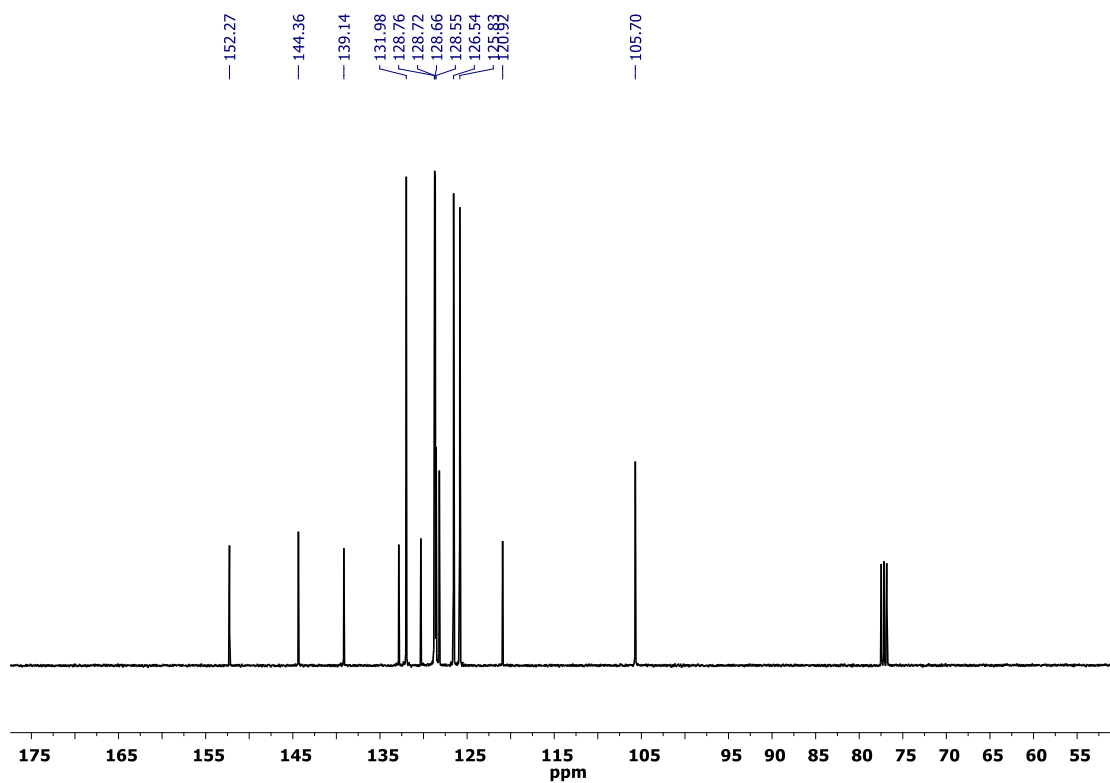

**Figure S14:**  $^{13}\text{C}$  NMR of compound **1a**.

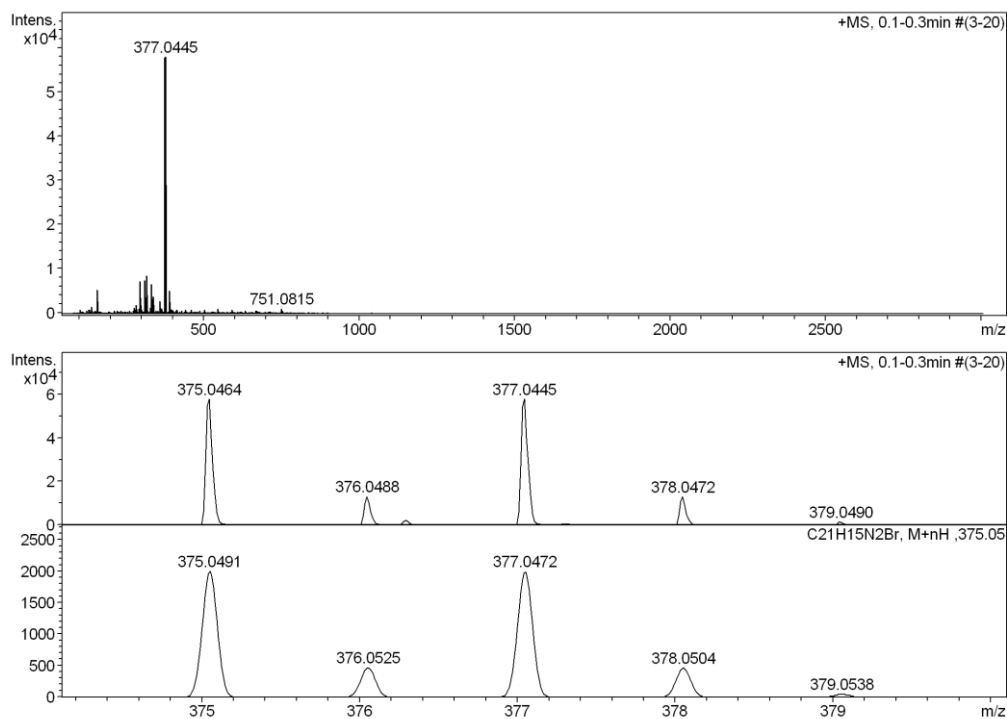

Figure S15: HRMS of compound 1a.

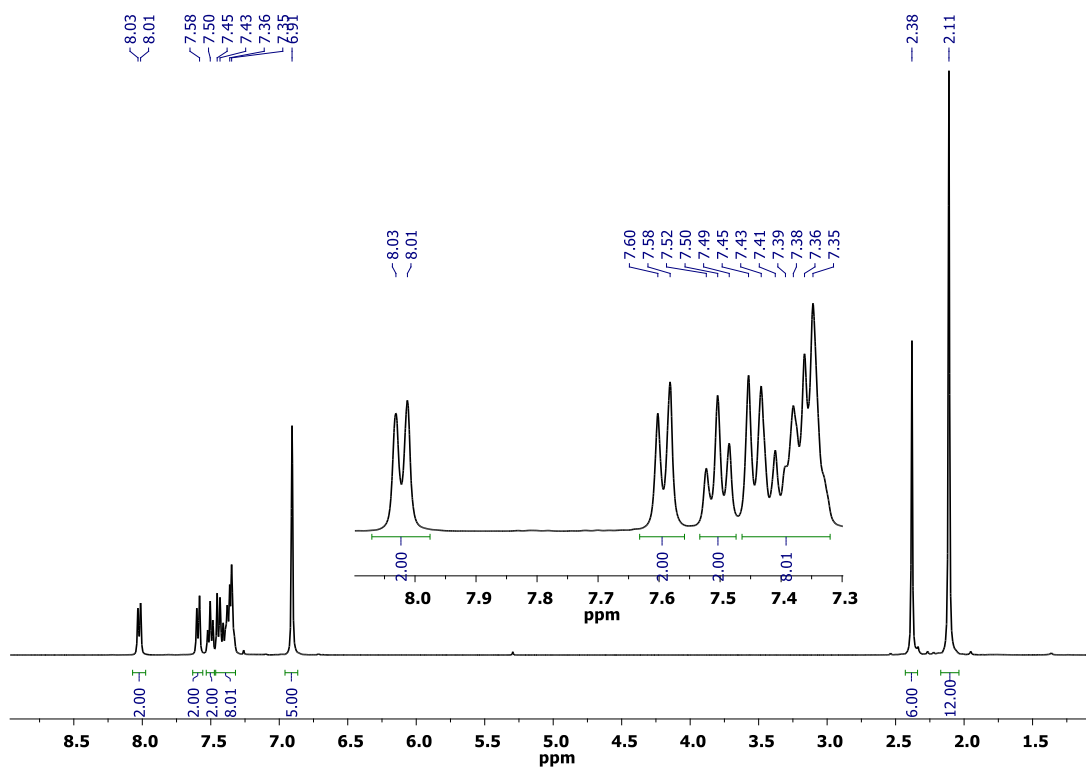

Figure S16:  $^1\text{H}$  NMR of compound 2a.

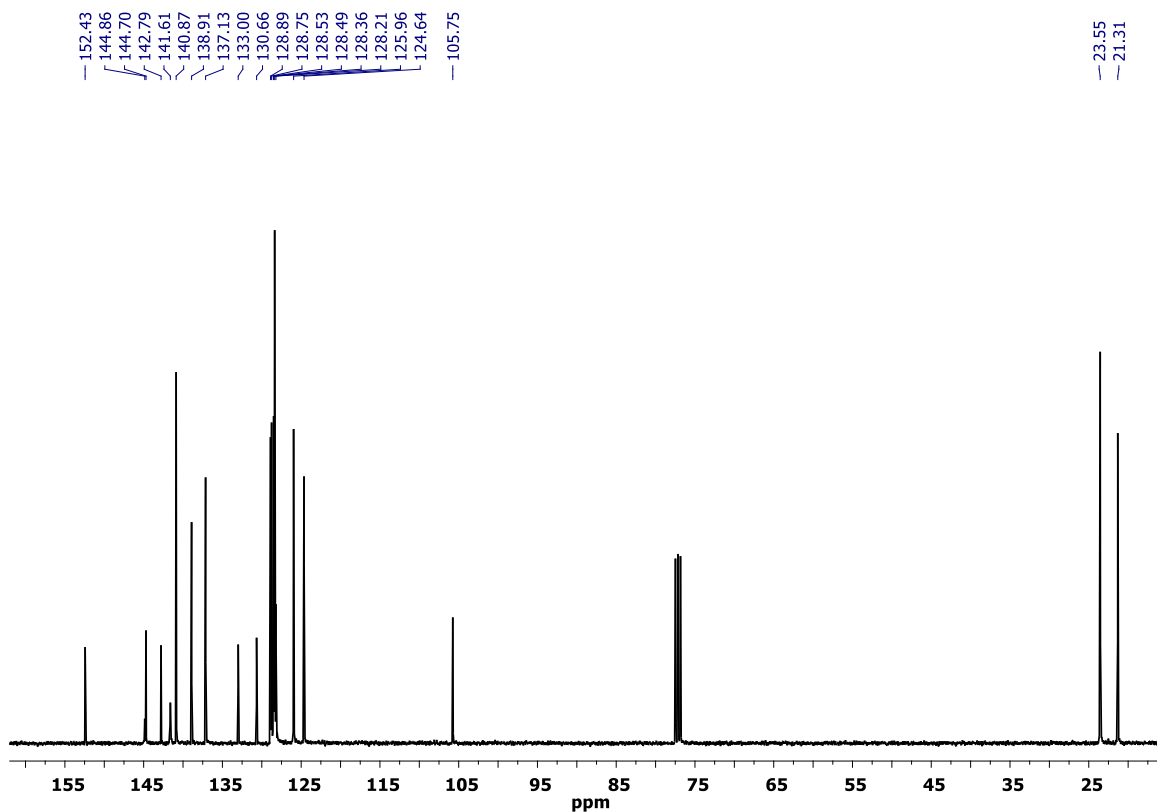

**Figure S17:**  $^{13}\text{C}$  NMR of compound **2a**.

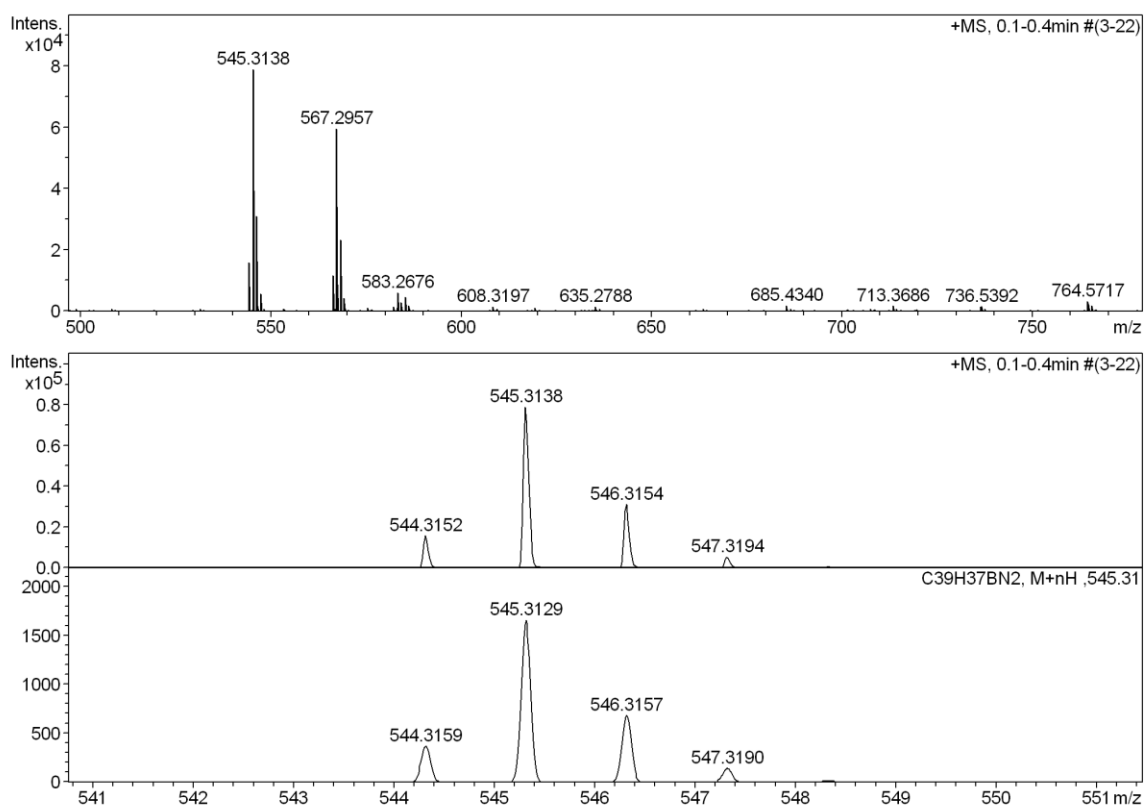

**Figure S18:** HRMS of compound **2a**.



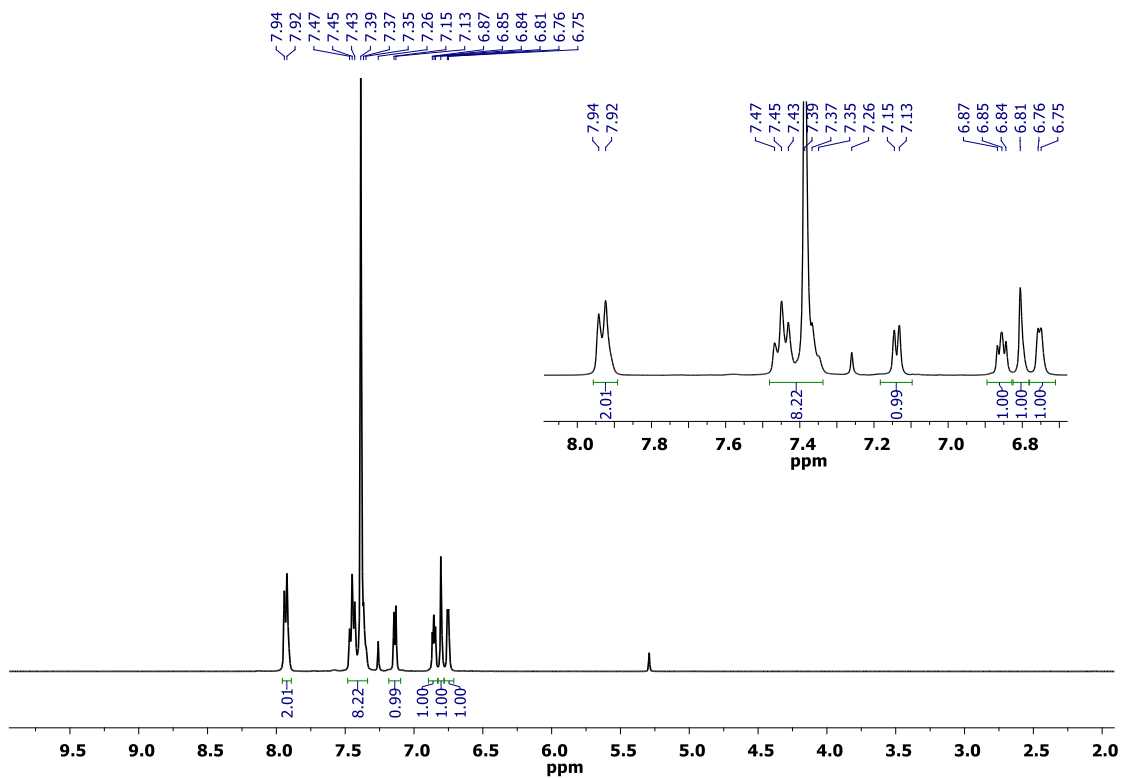

Figure S19:  $^1\text{H}$  NMR of compound Th-Pz-diPh.

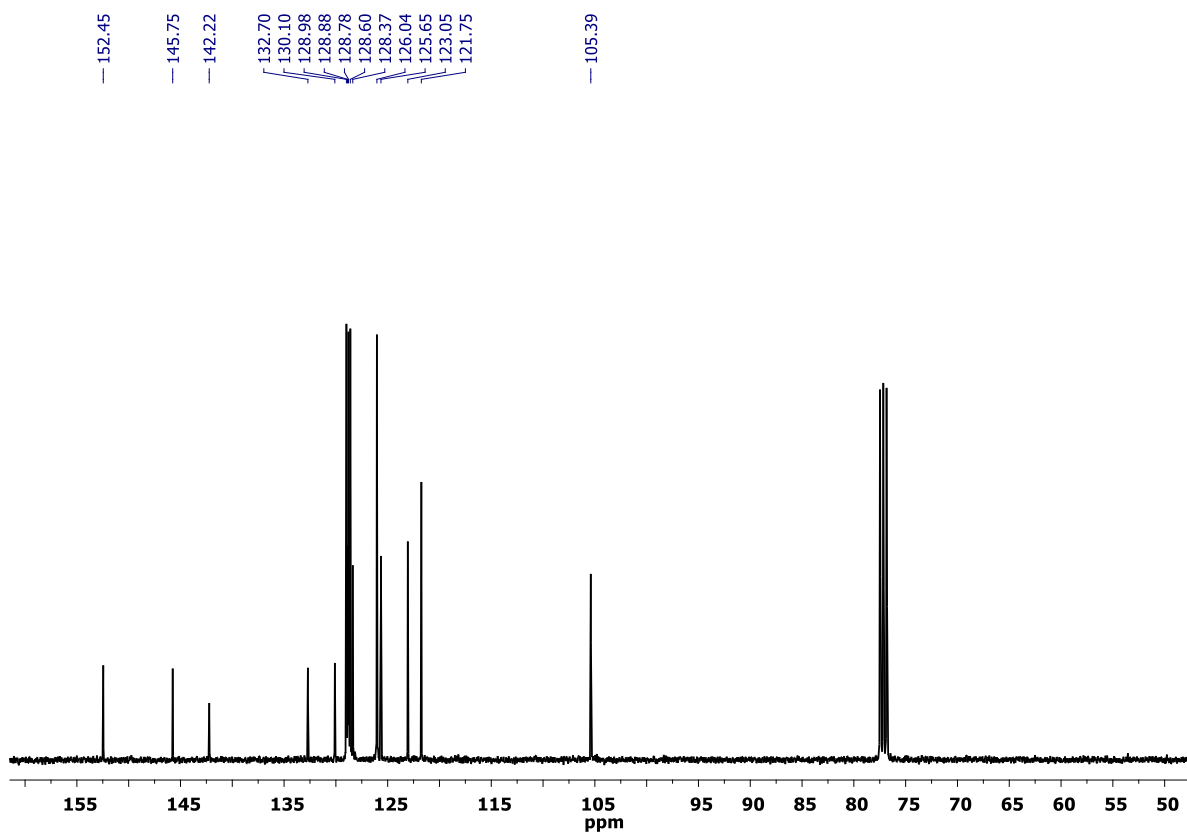

Figure S20:  $^{13}\text{C}$  NMR of Th-Pz-diPh.

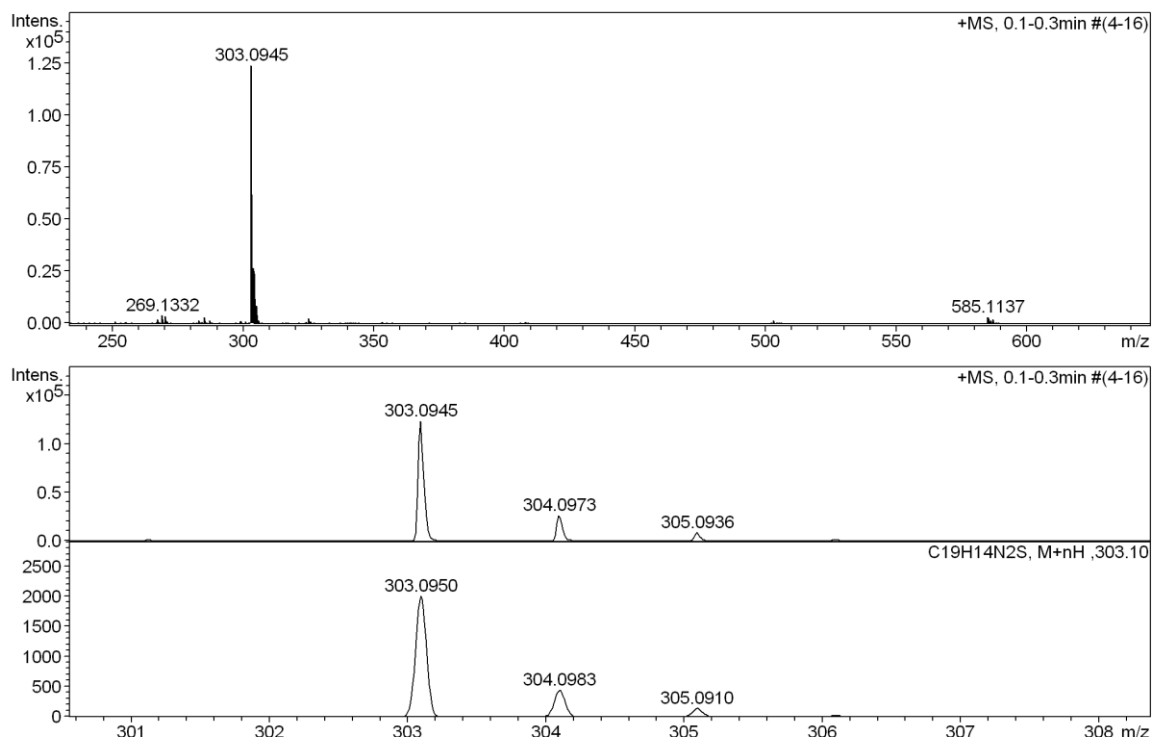

Figure S21: HRMS of Th-Pz-diPh.

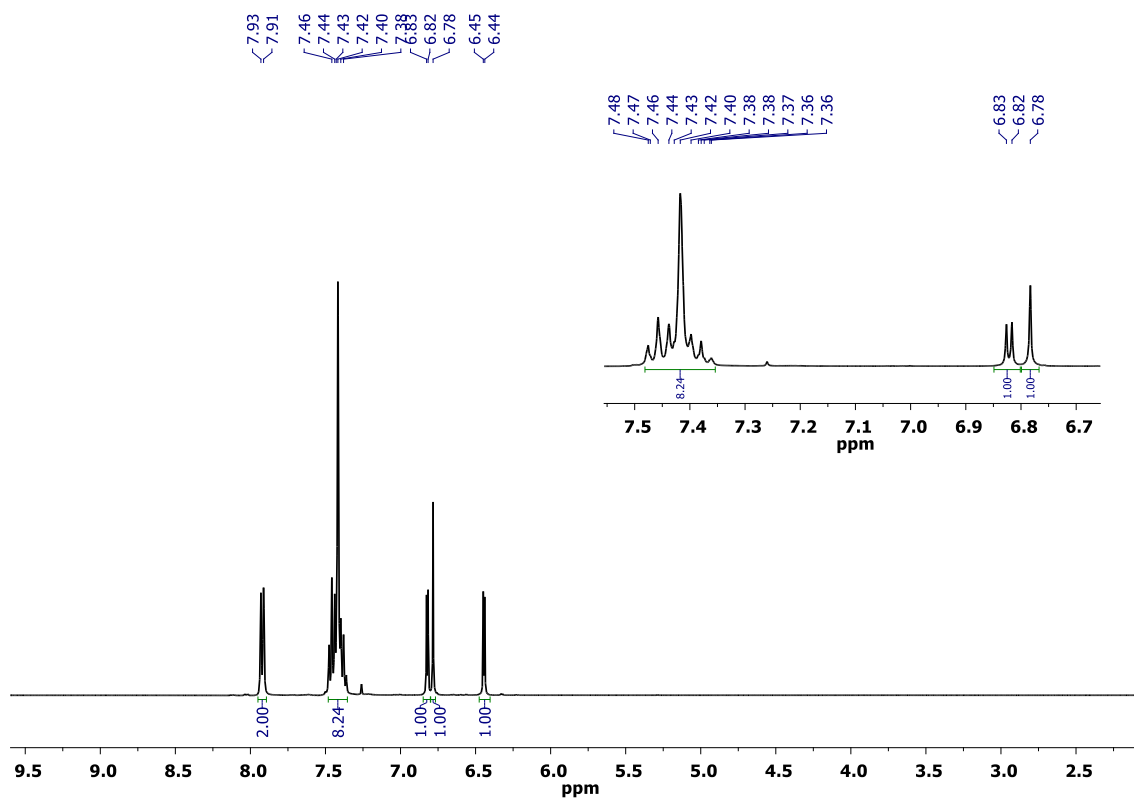

Figure S22: <sup>1</sup>H NMR of compound 1b.

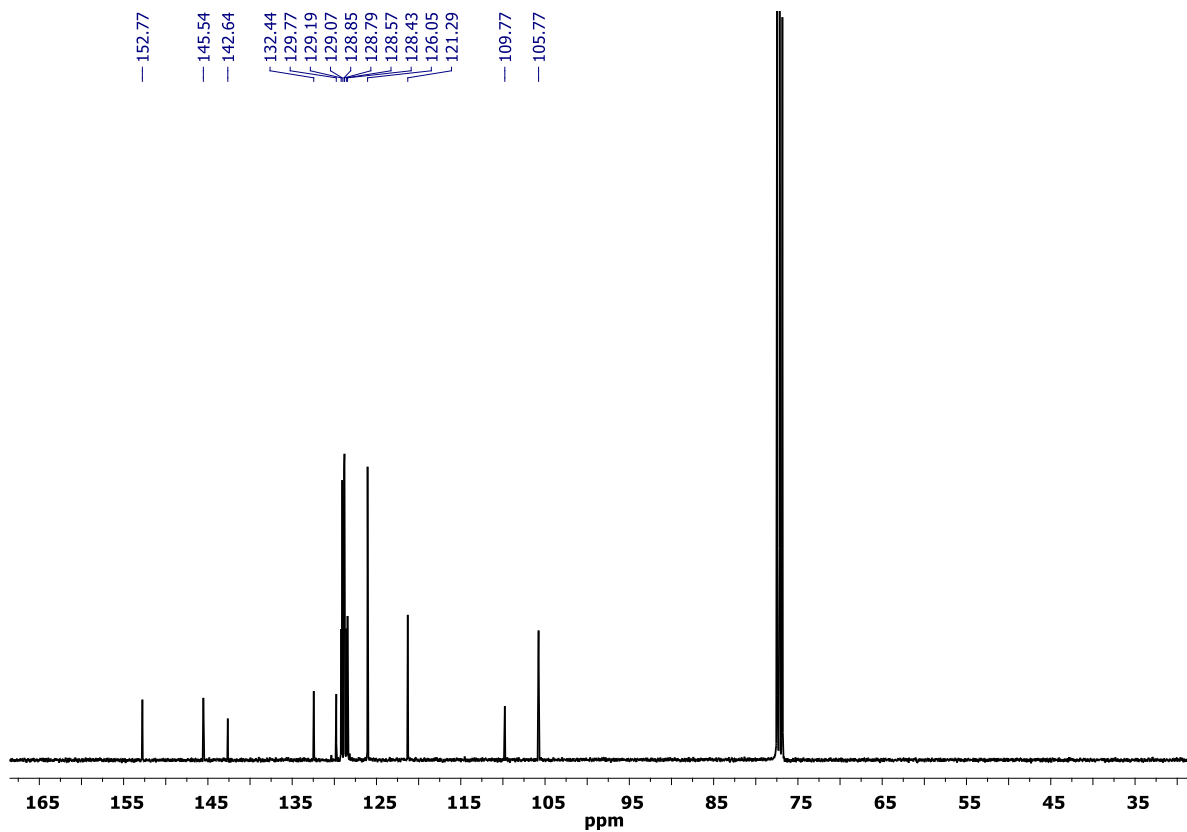

**Figure S23:**  $^{13}\text{C}$  NMR of compound **1b**.

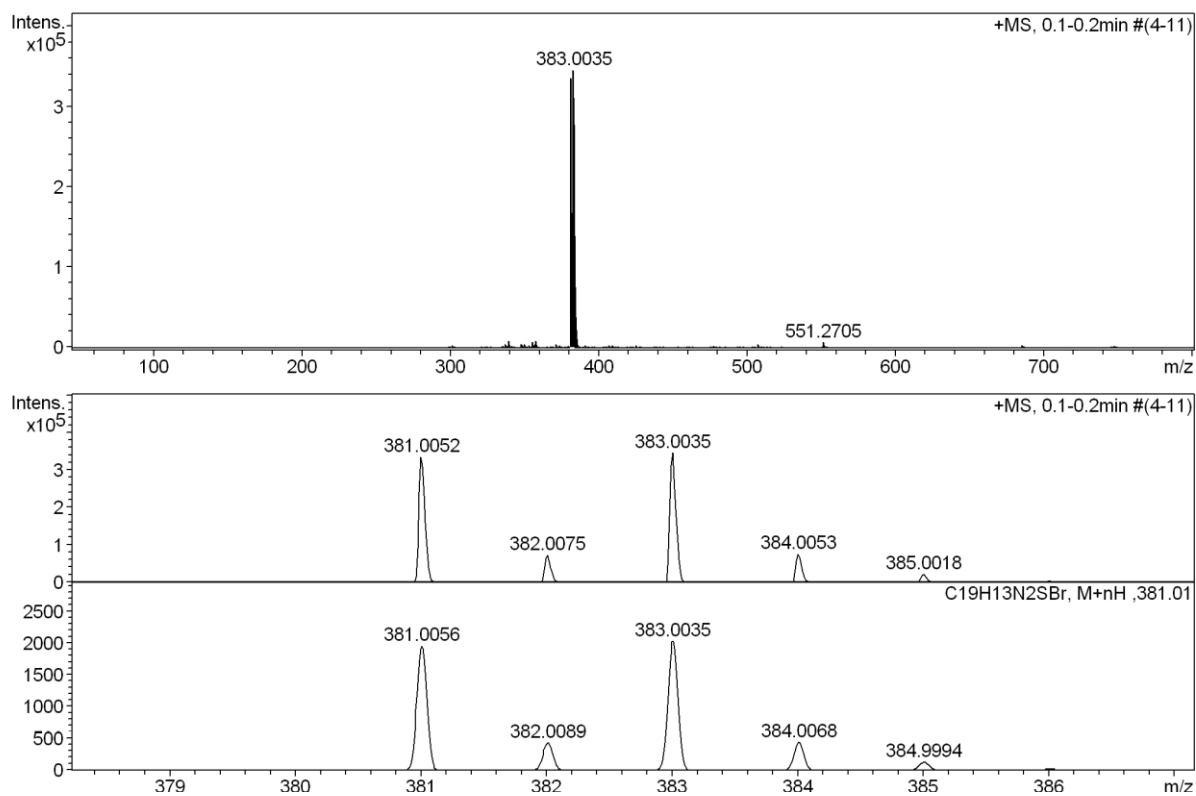

**Figure S24:** HRMS of compound **1b**.

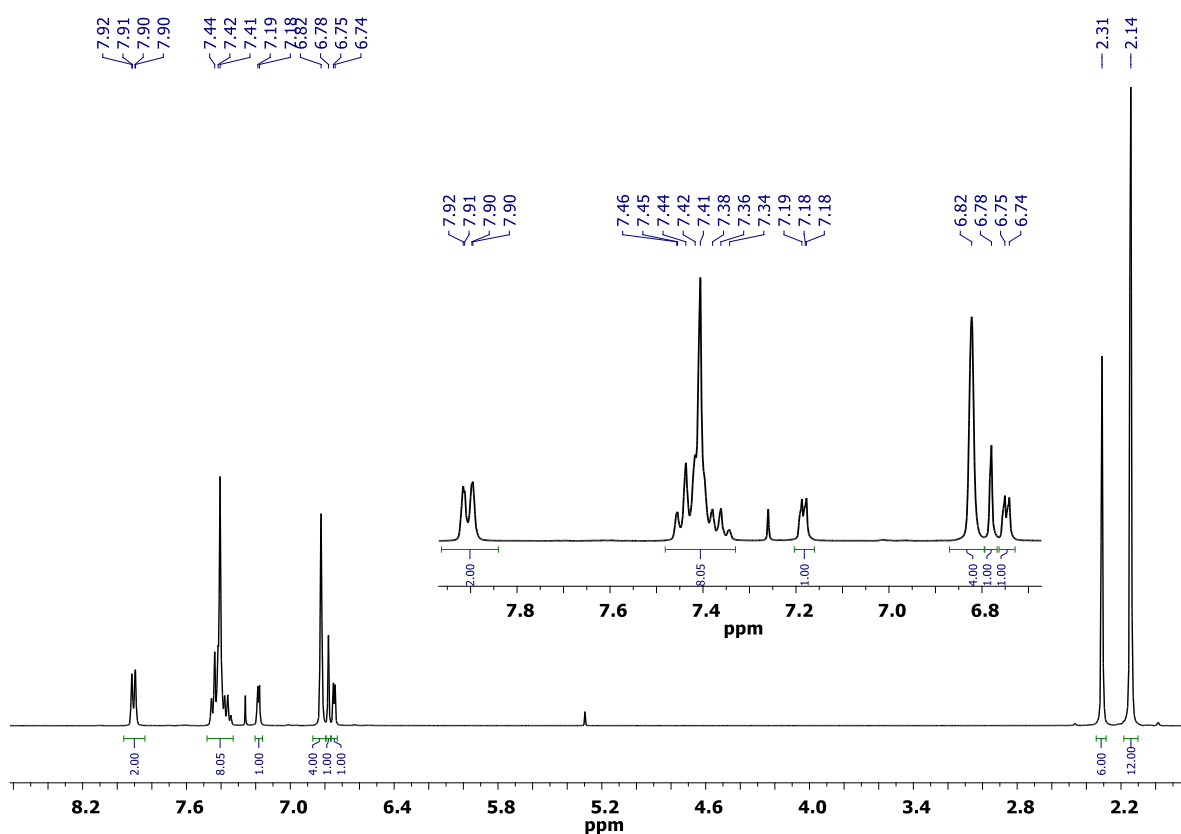

Figure S25:  $^1\text{H}$  NMR of compound **2b**.

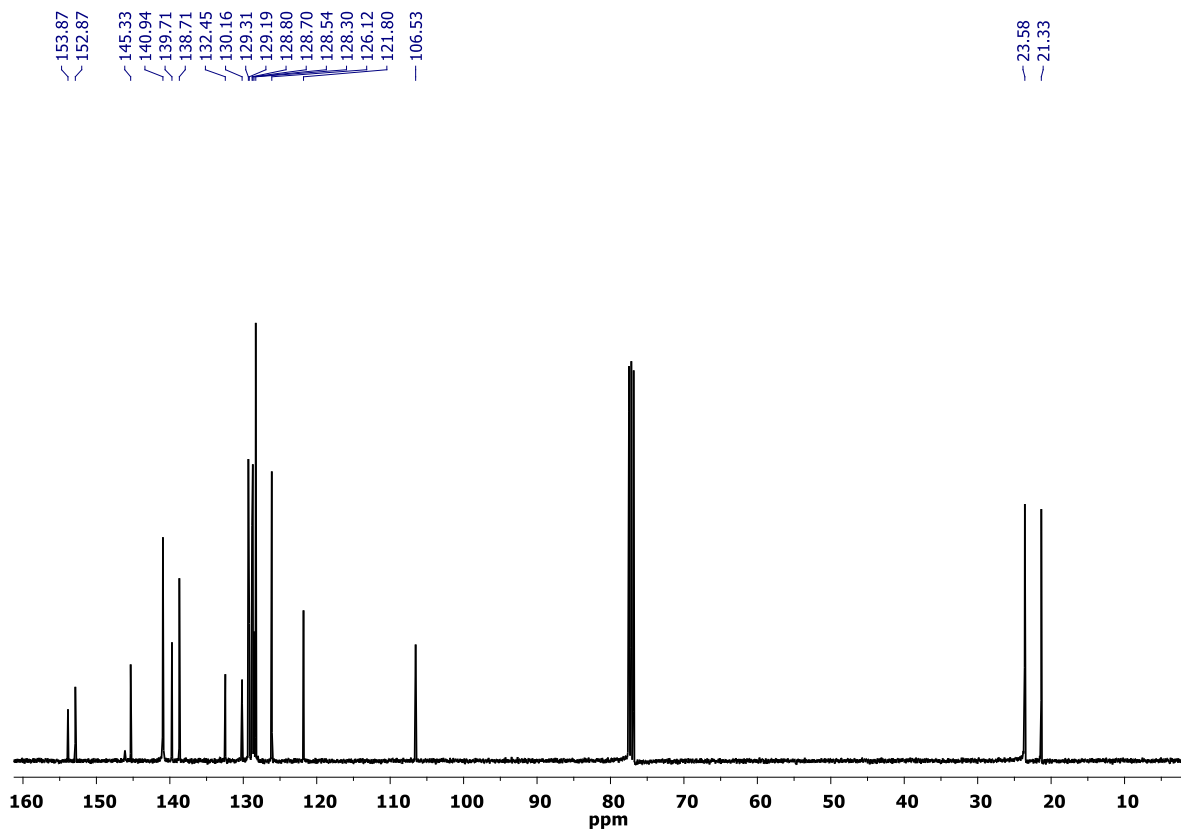

Figure S26:  $^{13}\text{C}$  NMR of compound **2b**.

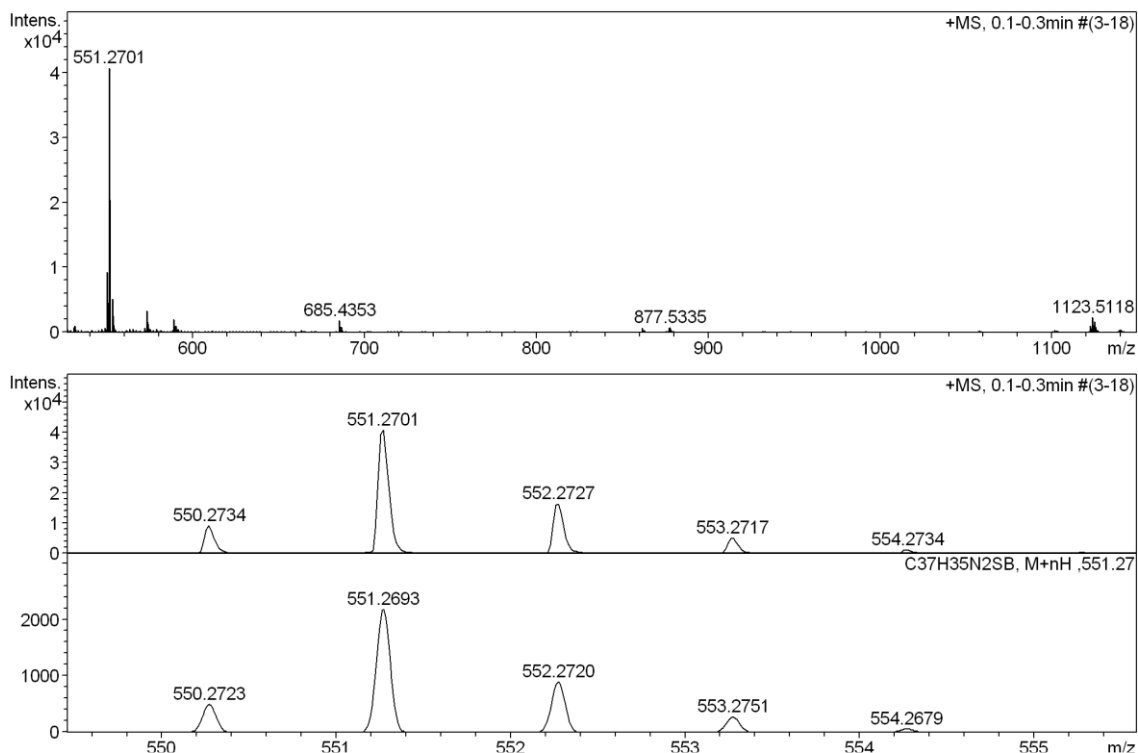

**Figure S27:** HRMS of compound **2b**.

Optimized x,y,z coordinates for compounds **2a**, **2b**, **2a-PA**, **2b-PA** & **picric acid** calculated on Gaussian 03 at the B3LYP//6-31g(d,p) level

**Compound 2a**

Center Atomic Atomic Coordinates (Angstroms)

Type X Y Z

| Type | X         | Y         | Z         |
|------|-----------|-----------|-----------|
| N    | -3.747454 | -0.869950 | -0.467018 |
| N    | -3.030624 | 0.123968  | 0.119907  |
| C    | 0.389760  | -1.290888 | 0.145811  |
| H    | 0.858588  | -2.260825 | 0.285994  |
| C    | 3.574035  | 0.813966  | -0.997415 |
| C    | 3.280588  | 1.072607  | -2.362911 |
| C    | 5.003201  | 2.804800  | -2.464355 |
| C    | 3.486021  | -1.486768 | 0.556077  |

|   |           |           |           |
|---|-----------|-----------|-----------|
| C | 4.328997  | -2.388495 | -0.149358 |
| C | 4.931391  | -3.458426 | 0.519339  |
| H | 5.557842  | -4.144630 | -0.046843 |
| C | 4.760843  | -3.668041 | 1.889452  |
| C | 3.943464  | -2.775187 | 2.583744  |
| H | 3.800313  | -2.911260 | 3.654142  |
| C | 3.298847  | -1.709215 | 1.947002  |
| C | 4.604066  | 1.580441  | -0.385578 |
| C | 5.280930  | 2.560134  | -1.117152 |
| H | 6.053225  | 3.145184  | -0.621715 |
| C | 2.208810  | 0.318046  | -3.128632 |
| H | 1.227347  | 0.792088  | -3.017694 |
| H | 2.444188  | 0.298923  | -4.196987 |
| H | 2.095434  | -0.715653 | -2.795023 |
| C | -8.141699 | -3.024042 | -1.889760 |
| H | -8.929533 | -3.662339 | -2.278855 |
| C | -8.451160 | -1.774226 | -1.352101 |
| H | -9.482185 | -1.433611 | -1.322111 |
| C | -7.439828 | -0.955073 | -0.852932 |
| H | -7.695532 | 0.017749  | -0.444235 |
| C | -6.100126 | -1.372075 | -0.880189 |
| C | -0.995500 | -1.198963 | 0.213935  |
| H | -1.613431 | -2.072545 | 0.384699  |
| C | 4.002111  | 2.043393  | -3.067362 |
| H | 3.772431  | 2.207870  | -4.118421 |
| C | 5.783685  | 3.833860  | -3.246268 |
| H | 6.730541  | 3.418254  | -3.613636 |
| H | 5.222599  | 4.185184  | -4.117162 |
| H | 6.032101  | 4.702632  | -2.628503 |

|   |           |           |           |
|---|-----------|-----------|-----------|
| C | 2.426121  | -0.815641 | 2.809859  |
| H | 1.379915  | -1.140472 | 2.792064  |
| H | 2.761003  | -0.844738 | 3.851135  |
| H | 2.435751  | 0.227696  | 2.486718  |
| C | 5.463487  | -4.799523 | 2.600386  |
| H | 6.449910  | -4.486326 | 2.965389  |
| H | 4.891906  | -5.144076 | 3.467514  |
| H | 5.621076  | -5.653890 | 1.935226  |
| C | -3.632338 | 4.650752  | 1.927518  |
| H | -4.078852 | 5.617203  | 1.712934  |
| C | -2.711142 | 4.519442  | 2.967389  |
| H | -2.439321 | 5.382047  | 3.568395  |
| C | -2.141994 | 3.271994  | 3.232787  |
| H | -1.431456 | 3.160104  | 4.046426  |
| C | -2.489042 | 2.162457  | 2.465400  |
| H | -2.055334 | 1.193368  | 2.688863  |
| C | -5.799159 | -2.631910 | -1.424914 |
| H | -4.764773 | -2.956682 | -1.449482 |
| C | -6.810583 | -3.447336 | -1.924329 |
| H | -6.559947 | -4.418558 | -2.341518 |
| C | -5.028259 | -0.512424 | -0.351250 |
| C | -1.612162 | 0.048496  | 0.056549  |
| C | 1.205420  | -0.165203 | -0.100230 |
| B | 2.768611  | -0.281104 | -0.181893 |
| C | -5.138494 | 0.733063  | 0.318949  |
| H | -6.033987 | 1.259797  | 0.611053  |
| C | -3.846583 | 1.120050  | 0.621009  |
| C | 4.576545  | -2.260652 | -1.638807 |
| H | 5.276463  | -3.027825 | -1.981079 |

|   |           |           |           |
|---|-----------|-----------|-----------|
| H | 3.653792  | -2.384345 | -2.217352 |
| H | 4.990155  | -1.283569 | -1.901569 |
| C | 4.980826  | 1.402801  | 1.071295  |
| H | 5.810169  | 2.063100  | 1.339242  |
| H | 4.146763  | 1.643947  | 1.740523  |
| H | 5.281150  | 0.375321  | 1.292530  |
| C | 0.545474  | 1.068954  | -0.276230 |
| H | 1.134992  | 1.956181  | -0.488903 |
| C | -0.838504 | 1.187591  | -0.196527 |
| H | -1.317768 | 2.147473  | -0.347846 |
| C | -3.409612 | 2.285406  | 1.410803  |
| C | -3.978101 | 3.543541  | 1.153925  |
| H | -4.684060 | 3.648395  | 0.335752  |

-----

**Compound 2b**

-----

Center Atomic Atomic Coordinates (Angstroms)

Type X Y Z

-----

|   |           |           |           |
|---|-----------|-----------|-----------|
| C | -3.089443 | 4.323054  | 1.568153  |
| C | -2.576032 | 3.301536  | 2.361282  |
| H | -2.285535 | 3.520327  | 3.387356  |
| C | -2.422503 | 1.992148  | 1.882473  |
| C | -2.803260 | 1.666807  | 0.556443  |
| B | -2.601543 | 0.210361  | -0.039040 |
| C | -1.176532 | -0.386126 | -0.106095 |
| S | 0.268448  | 0.601297  | 0.104685  |
| C | 1.303965  | -0.773171 | -0.127675 |



|   |           |           |           |
|---|-----------|-----------|-----------|
| N | 2.693986  | -0.603182 | -0.089331 |
| N | 3.198485  | 0.599071  | -0.478593 |
| C | 4.524429  | 0.470486  | -0.428113 |
| C | 5.403696  | 1.596834  | -0.780102 |
| C | 6.798102  | 1.441985  | -0.810236 |
| H | 7.241685  | 0.478849  | -0.577062 |
| C | 7.625618  | 2.513249  | -1.142478 |
| H | 8.702754  | 2.374545  | -1.160648 |
| C | 7.073972  | 3.756994  | -1.451896 |
| H | 7.718782  | 4.591632  | -1.710848 |
| C | 4.881459  | -0.837978 | -0.004484 |
| H | 5.867469  | -1.237827 | 0.175623  |
| C | 3.696187  | -1.507520 | 0.221017  |
| C | 0.592764  | -1.934398 | -0.354132 |
| H | 1.053664  | -2.895699 | -0.535025 |
| C | -0.800258 | -1.701774 | -0.338973 |
| H | -1.535398 | -2.481016 | -0.506028 |
| C | -3.796063 | -0.687384 | -0.576374 |
| C | -4.856137 | -1.074668 | 0.293838  |
| C | -5.875360 | -1.908585 | -0.164834 |
| H | -6.663962 | -2.201297 | 0.525699  |
| C | -5.914632 | -2.379280 | -1.482705 |
| C | -7.040025 | -3.268824 | -1.953660 |
| H | -8.001427 | -2.741992 | -1.928158 |
| H | -7.144193 | -4.153290 | -1.315012 |
| H | -6.876207 | -3.612010 | -2.978894 |
| C | -4.888886 | -1.987077 | -2.337063 |
| H | -4.900208 | -2.327188 | -3.371215 |
| C | -3.838115 | -1.159997 | -1.912100 |

|   |           |           |           |
|---|-----------|-----------|-----------|
| C | -2.825880 | -0.762215 | -2.970601 |
| H | -2.411837 | -1.645957 | -3.469130 |
| H | -1.990035 | -0.189797 | -2.570969 |
| H | -3.305934 | -0.155438 | -3.747930 |
| C | -4.898997 | -0.636316 | 1.742995  |
| H | -5.809755 | -0.996465 | 2.229432  |
| H | -4.872124 | 0.452667  | 1.837953  |
| H | -4.048626 | -1.028885 | 2.312038  |
| C | -3.471257 | 3.999814  | 0.260566  |
| H | -3.876996 | 4.780319  | -0.380213 |
| C | -3.348323 | 2.707907  | -0.249271 |
| C | -3.774002 | 2.465698  | -1.682320 |
| H | -2.927309 | 2.172531  | -2.313335 |
| H | -4.204226 | 3.372272  | -2.116692 |
| H | -4.519453 | 1.668884  | -1.754817 |
| C | -1.909519 | 0.965348  | 2.875103  |
| H | -0.975966 | 1.302203  | 3.338602  |
| H | -1.721064 | -0.008413 | 2.422944  |
| H | -2.635517 | 0.820234  | 3.684488  |
| C | 3.503489  | -2.865957 | 0.761628  |
| C | 2.686122  | -3.104741 | 1.879251  |
| H | 2.147956  | -2.280627 | 2.335923  |
| C | 2.572862  | -4.388205 | 2.408430  |
| H | 1.939626  | -4.557546 | 3.274205  |
| C | 3.276995  | -5.450894 | 1.837179  |
| H | 3.187328  | -6.450041 | 2.252900  |
| C | 4.097835  | -5.222265 | 0.732401  |
| H | 4.648214  | -6.043089 | 0.282238  |
| C | 4.210152  | -3.939330 | 0.196952  |

|   |           |           |           |
|---|-----------|-----------|-----------|
| H | 4.839548  | -3.761750 | -0.669677 |
| C | 4.857784  | 2.853128  | -1.093849 |
| H | 3.780536  | 2.975927  | -1.071763 |
| C | 5.686528  | 3.920553  | -1.426547 |
| H | 5.248448  | 4.885252  | -1.666010 |
| C | -3.224737 | 5.734508  | 2.086606  |
| H | -2.503522 | 6.405324  | 1.603967  |
| H | -3.051021 | 5.783456  | 3.165154  |
| H | -4.222431 | 6.140059  | 1.885763  |

**Compound 2a-PA**

Center Atomic Atomic Coordinates (Angstroms)

Type X Y Z

|   |           |           |           |
|---|-----------|-----------|-----------|
| N | 2.339500  | -2.097182 | -0.029198 |
| C | -0.979114 | -0.939842 | 1.152030  |
| H | -1.429362 | -0.594144 | 2.078027  |
| C | -3.954224 | -0.071663 | -1.320143 |
| C | -3.405798 | 1.058241  | -1.986882 |
| C | -5.111367 | 0.925071  | -3.733650 |
| C | -4.106949 | -0.826135 | 1.354404  |
| C | -4.802433 | 0.253067  | 1.966610  |
| C | -5.494183 | 0.052665  | 3.164599  |
| H | -6.004018 | 0.898011  | 3.622106  |
| C | -5.555428 | -1.195891 | 3.787183  |
| C | -4.880489 | -2.256013 | 3.180682  |
| H | -4.919600 | -3.241122 | 3.641541  |
| C | -4.152104 | -2.092504 | 1.997764  |

|   |           |           |           |
|---|-----------|-----------|-----------|
| C | -5.098291 | -0.688281 | -1.895908 |
| C | -5.639673 | -0.193663 | -3.086674 |
| H | -6.505537 | -0.693939 | -3.515561 |
| C | -2.195164 | 1.808172  | -1.461395 |
| H | -1.262377 | 1.305151  | -1.739242 |
| H | -2.163005 | 2.817539  | -1.882419 |
| H | -2.193747 | 1.906411  | -0.372844 |
| C | 8.005714  | 0.097662  | 1.788610  |
| H | 8.911040  | 0.569735  | 2.158469  |
| C | 8.076312  | -0.855550 | 0.771511  |
| H | 9.036901  | -1.123879 | 0.341656  |
| C | 6.914672  | -1.461043 | 0.296800  |
| H | 6.976794  | -2.185946 | -0.509166 |
| C | 5.662110  | -1.125597 | 0.833416  |
| C | 0.369201  | -1.284804 | 1.148362  |
| H | 0.971920  | -1.197559 | 2.044727  |
| C | -3.996261 | 1.538448  | -3.160029 |
| H | -3.572023 | 2.418450  | -3.639548 |
| C | -5.745671 | 1.473894  | -4.988828 |
| H | -6.525659 | 2.207611  | -4.749171 |
| H | -5.009844 | 1.978856  | -5.621872 |
| H | -6.216748 | 0.682038  | -5.578968 |
| C | -3.450349 | -3.319312 | 1.443509  |
| H | -2.399379 | -3.352094 | 1.751460  |
| H | -3.928797 | -4.231853 | 1.811384  |
| H | -3.460031 | -3.358348 | 0.351493  |
| C | -6.349868 | -1.395376 | 5.055359  |
| H | -7.419891 | -1.507572 | 4.839550  |
| H | -6.028837 | -2.292781 | 5.592059  |

|   |           |           |           |
|---|-----------|-----------|-----------|
| H | -6.246451 | -0.540154 | 5.730750  |
| C | 2.242925  | -6.146350 | -2.788226 |
| H | 2.669654  | -6.600053 | -3.677773 |
| C | 1.113768  | -6.705607 | -2.188440 |
| H | 0.659133  | -7.598575 | -2.606747 |
| C | 0.572438  | -6.112685 | -1.045992 |
| H | -0.300490 | -6.547592 | -0.568495 |
| C | 1.152388  | -4.967247 | -0.504974 |
| H | 0.735106  | -4.523543 | 0.392644  |
| C | 5.601827  | -0.167636 | 1.859022  |
| H | 4.639983  | 0.085727  | 2.292500  |
| C | 6.763875  | 0.439542  | 2.328498  |
| H | 6.701172  | 1.175535  | 3.124874  |
| C | 4.440201  | -1.780178 | 0.339766  |
| C | 0.956101  | -1.746966 | -0.034308 |
| C | -1.771973 | -1.020326 | -0.011397 |
| B | -3.297750 | -0.629202 | 0.008818  |
| C | 4.316875  | -3.027728 | -0.314058 |
| H | 5.096171  | -3.743056 | -0.527129 |
| C | 2.962556  | -3.215538 | -0.533638 |
| C | -4.772402 | 1.655360  | 1.395907  |
| H | -5.489267 | 2.298661  | 1.913569  |
| H | -3.783096 | 2.111801  | 1.517836  |
| H | -5.012474 | 1.669211  | 0.330302  |
| C | -5.748697 | -1.911770 | -1.282659 |
| H | -6.642618 | -2.195894 | -1.844555 |
| H | -5.075846 | -2.777403 | -1.287841 |
| H | -6.040732 | -1.740221 | -0.243836 |
| C | -1.139122 | -1.469666 | -1.188942 |

|   |           |           |           |
|---|-----------|-----------|-----------|
| H | -1.713219 | -1.524564 | -2.109576 |
| C | 0.203107  | -1.839709 | -1.209427 |
| H | 0.671014  | -2.182726 | -2.125704 |
| C | 2.284964  | -4.392527 | -1.105570 |
| C | 2.823912  | -4.998363 | -2.252381 |
| H | 3.693693  | -4.555197 | -2.727647 |
| N | 3.235722  | -1.219172 | 0.501059  |
| H | 2.798737  | 0.712735  | 0.575671  |
| C | 2.603073  | 3.111779  | -0.500522 |
| C | 1.898790  | 2.464772  | 0.557836  |
| C | 0.787397  | 3.191027  | 1.078743  |
| C | 0.400985  | 4.425772  | 0.594083  |
| C | 1.149177  | 5.015186  | -0.422075 |
| C | 2.242584  | 4.369302  | -0.973417 |
| H | -0.472561 | 4.922137  | 0.995815  |
| H | 2.815334  | 4.826341  | -1.769236 |
| N | -0.037062 | 2.620584  | 2.157948  |
| N | 3.751244  | 2.475685  | -1.145859 |
| N | 0.760905  | 6.335836  | -0.927796 |
| O | 2.155188  | 1.286550  | 1.071476  |
| O | -1.246271 | 2.858451  | 2.105577  |
| O | 0.521023  | 1.983570  | 3.041388  |
| O | 4.380740  | 3.122299  | -1.976021 |
| O | 4.018775  | 1.313468  | -0.820734 |
| O | 1.432568  | 6.812777  | -1.840403 |
| O | -0.211624 | 6.876144  | -0.403438 |

---

**Compoun2b-PA**

Center Atomic Atomic Coordinates (Angstroms)

Type X Y Z

---

|   |           |           |           |
|---|-----------|-----------|-----------|
| C | -3.474960 | -0.915039 | 4.805510  |
| C | -2.997357 | -2.087330 | 4.227227  |
| H | -2.777379 | -2.942086 | 4.864312  |
| C | -2.795373 | -2.207805 | 2.845027  |
| C | -3.085547 | -1.120209 | 1.982133  |
| B | -2.823010 | -1.209660 | 0.422012  |
| C | -1.387162 | -1.496155 | -0.085411 |
| S | 0.031529  | -1.304109 | 0.940683  |
| C | 1.093423  | -1.766183 | -0.355670 |
| N | 2.484432  | -1.791567 | -0.165156 |
| N | 3.086720  | -0.732604 | 0.450898  |
| C | 4.397943  | -0.988505 | 0.405316  |
| C | 5.383290  | -0.069812 | 0.998627  |
| C | 6.709593  | -0.062452 | 0.538082  |
| H | 6.999840  | -0.721188 | -0.274970 |
| C | 7.651160  | 0.798450  | 1.098353  |
| H | 8.672084  | 0.793983  | 0.727826  |
| C | 7.281984  | 1.667768  | 2.126201  |
| H | 8.015529  | 2.338765  | 2.563379  |
| C | 4.642262  | -2.217614 | -0.256765 |
| H | 5.588815  | -2.717316 | -0.394017 |
| C | 3.404091  | -2.722715 | -0.604389 |
| C | 0.408045  | -2.074576 | -1.509089 |
| H | 0.893477  | -2.373935 | -2.428716 |
| C | -0.986969 | -1.917844 | -1.344880 |

|   |           |           |           |
|---|-----------|-----------|-----------|
| H | -1.704173 | -2.095917 | -2.138152 |
| C | -3.950580 | -1.019974 | -0.676518 |
| C | -5.096393 | -1.863419 | -0.698449 |
| C | -6.059564 | -1.715022 | -1.697771 |
| H | -6.920382 | -2.380820 | -1.699423 |
| C | -5.956899 | -0.731855 | -2.687336 |
| C | -7.015220 | -0.593800 | -3.755132 |
| H | -8.019671 | -0.553938 | -3.319633 |
| H | -6.998768 | -1.447622 | -4.443366 |
| H | -6.868544 | 0.312502  | -4.348933 |
| C | -4.846753 | 0.109648  | -2.650061 |
| H | -4.754372 | 0.897285  | -3.395330 |
| C | -3.844575 | -0.022599 | -1.679890 |
| C | -2.692108 | 0.964220  | -1.745861 |
| H | -1.898777 | 0.624186  | -2.420520 |
| H | -2.226258 | 1.130495  | -0.773060 |
| H | -3.045503 | 1.931711  | -2.117757 |
| C | -5.301152 | -2.958228 | 0.328057  |
| H | -6.232888 | -3.497898 | 0.137686  |
| H | -5.345296 | -2.556322 | 1.344321  |
| H | -4.488731 | -3.692901 | 0.308808  |
| C | -3.772157 | 0.154473  | 3.952726  |
| H | -4.151655 | 1.080936  | 4.379073  |
| C | -3.597978 | 0.071963  | 2.571610  |
| C | -3.928574 | 1.296373  | 1.743980  |
| H | -3.024629 | 1.764170  | 1.334942  |
| H | -4.432049 | 2.051455  | 2.353807  |
| H | -4.576913 | 1.055814  | 0.897876  |
| C | -2.342535 | -3.567559 | 2.345995  |



|   |           |           |           |
|---|-----------|-----------|-----------|
| H | -1.445578 | -3.901349 | 2.878994  |
| H | -2.117884 | -3.579829 | 1.279386  |
| H | -3.121118 | -4.318174 | 2.528805  |
| C | 3.080139  | -4.011501 | -1.240295 |
| C | 2.089896  | -4.864746 | -0.725431 |
| H | 1.521490  | -4.564046 | 0.148410  |
| C | 1.846934  | -6.100738 | -1.319997 |
| H | 1.081351  | -6.751984 | -0.909035 |
| C | 2.588613  | -6.506759 | -2.431648 |
| H | 2.396269  | -7.471021 | -2.892377 |
| C | 3.578875  | -5.669021 | -2.945911 |
| H | 4.158729  | -5.976369 | -3.811049 |
| C | 3.823152  | -4.429798 | -2.355838 |
| H | 4.583279  | -3.771232 | -2.764679 |
| C | 5.021094  | 0.805847  | 2.035627  |
| H | 4.002761  | 0.798768  | 2.407213  |
| C | 5.964614  | 1.668068  | 2.590026  |
| H | 5.671211  | 2.337118  | 3.393830  |
| C | -3.662124 | -0.789193 | 6.298104  |
| H | -2.919318 | -0.110480 | 6.734546  |
| H | -3.559903 | -1.756456 | 6.797753  |
| H | -4.649484 | -0.383562 | 6.544344  |
| O | 1.781834  | 1.481878  | -0.793529 |
| O | -1.156586 | 6.852111  | -2.038410 |
| O | 1.101123  | 3.170236  | -4.245173 |
| O | -1.004380 | 7.037284  | 0.133055  |
| O | 0.736725  | 1.261767  | -3.248486 |
| N | -0.822365 | 6.443428  | -0.927821 |
| N | 0.870332  | 2.480211  | -3.253248 |

|   |           |          |           |
|---|-----------|----------|-----------|
| C | 1.141125  | 2.625463 | -0.753117 |
| C | 0.876003  | 3.398876 | 0.415857  |
| C | 0.234869  | 4.632817 | 0.362347  |
| H | 0.052287  | 5.185018 | 1.274515  |
| C | -0.152252 | 5.140016 | -0.865704 |
| C | 0.697298  | 3.200567 | -1.978311 |
| C | 0.085303  | 4.437066 | -2.045560 |
| H | -0.206156 | 4.849630 | -3.002644 |
| N | 1.280336  | 2.924022 | 1.735470  |
| O | 1.045637  | 3.629212 | 2.708381  |
| O | 1.843208  | 1.819912 | 1.799383  |
| H | 2.061391  | 1.156033 | 0.099466  |

**Picric acid**

Center Atomic Atomic Coordinates (Angstroms)

Type X Y Z

|   |           |           |           |
|---|-----------|-----------|-----------|
| O | -3.520040 | -1.273437 | 0.052320  |
| O | 0.704891  | -3.481285 | 0.001043  |
| O | -3.625068 | 0.909315  | 0.045979  |
| O | 2.570235  | -2.368937 | -0.085900 |
| N | -3.011511 | -0.154953 | 0.040644  |
| N | 1.321514  | -2.429284 | -0.032118 |
| C | 1.273957  | 0.070664  | -0.018850 |
| C | 0.459219  | 1.234293  | -0.005844 |
| C | -0.921838 | 1.164107  | -0.004036 |
| H | -1.508906 | 2.073302  | -0.022038 |
| C | -1.543750 | -0.083415 | 0.018990  |
| C | 0.578866  | -1.175454 | -0.009918 |

|   |           |           |           |
|---|-----------|-----------|-----------|
| C | -0.810075 | -1.256543 | 0.017218  |
| H | -1.301395 | -2.220519 | 0.029954  |
| N | 1.059098  | 2.582335  | 0.011981  |
| O | 0.391741  | 3.483806  | -0.492668 |
| O | 2.152043  | 2.713932  | 0.547713  |
| O | 2.585209  | 0.166781  | -0.073027 |
| H | 2.936236  | -0.762782 | -0.100497 |
